# Supplementary material for: Combined structural and theoretical investigation on differently substituted bispidine ligands: predicting the properties of their corresponding coordination polymers
Source: Royal Society of Chemistry journal article supplement (doi:10.1039/d0dt00799d), 2020-01-01
Supplement: d0dt00799d1.pdf [file d0dt00799d1.pdf]

# Electronic Supplementary Information

*for*

## Combined Structural and Theoretical Investigation on Differently Substituted Bispidine Ligands: Predicting the Properties of their Corresponding Coordination Polymers.

Martina Lippi,<sup>a</sup> Josefina Caputo,<sup>a</sup> Antonino Famulari,<sup>a</sup> Alessandro Sacchetti,<sup>a</sup> Carlo Castellano,<sup>b</sup> Fiorella Meneghetti,<sup>c</sup>  
Javier Martí-Rujas,<sup>a,d</sup> and Massimo Cametti <sup>a\*</sup>

<sup>a</sup> Dipartimento di Chimica, Materiali e Ingegneria Chimica, Politecnico di Milano, Via Luigi Mancinelli, 7, 20131, Milano, Italy. Email: massimo.cametti@polimi.it

<sup>b</sup> Dipartimento di Chimica, Università degli Studi di Milano, Via Golgi 19, 20133 Milano, Italy

<sup>c</sup> Dipartimento di Scienze Farmaceutiche, Università degli Studi di Milano, Via L. Mangiagalli 25, 20133 Milano, Italy

<sup>d</sup> Center for Nano Science and Technology@Polimi, Istituto Italiano di Tecnologia, Via Pascoli 70/3, 20133 Milano, Italy

### Table of content:

|                                                                                                 |                     |
|-------------------------------------------------------------------------------------------------|---------------------|
| Synthesis of the Bispidine Ligands <b>L1-L7</b> .....                                           | <b>pag. S2</b>      |
| Figures S1-S10 ( <sup>1</sup> H- and <sup>13</sup> C NMR of Ligands <b>L2, L3, L5-L7</b> )..... | <b>pag. S4-S8</b>   |
| Figures S11-S18 (X-ray Powder Diffraction Patterns for ligands <b>L1-L7</b> ).....              | <b>pag. S9-S11</b>  |
| Details on DFT-calculations.....                                                                | <b>pag. S12</b>     |
| Table S1.....                                                                                   | <b>pag. S12</b>     |
| X-ray characterization.....                                                                     | <b>pag. S13</b>     |
| Crystallographic Tables.....                                                                    | <b>pag. S14-S16</b> |
| PDB files used for DFT calculations.....                                                        | <b>pag. S20</b>     |

### Synthesis of the Bispidine Ligands L1-L7

Procedures for obtaining Ligand **L1**, Ligand **L4** and Piperidone **A** were previously reported by us (ref. 9)

**Ligand L2:** Piperidone **A** (1 g, 2.6 mmol) was suspended in methanol. A second solution consisting of paraformaldehyde (470 mg, 15.7 mmol) and isopropylamine (0.7 mL, 7.8 mmol) in methanol was then added to the piperidone. The reaction was stirred and refluxed overnight. The solution was left to cool, and while the solvent slowly evaporated, crystals were formed. After recrystallization from methanol, 900 mg of product were obtained, affording a 75 % yield.  $^1\text{H}$  NMR (400 MHz, Chloroform-*d*)  $\delta$  8.73 (d,  $J$  = 5.2 Hz, 2H), 8.57 (d,  $J$  = 5.1 Hz, 2H), 8.16 (d,  $J$  = 4.9 Hz, 2H), 7.08 (d,  $J$  = 5.9 Hz, 2H), 4.56 (s, 2H), 3.77 (s, 6H), 3.10 (d,  $J$  = 13.0 Hz, 2H), 2.84 (d,  $J$  = 12.9 Hz, 2H), 2.28 (s, 1H), 1.89 (s, 3H), 1.17 (d,  $J$  = 6.6 Hz, 6H);  $^{13}\text{C}$  NMR (101 MHz,  $\text{CDCl}_3$ )  $\delta$  203.14, 167.95 (2C), 149.89 (2C), 149.64 (2C), 148.17 (2C), 124.54 (2C), 124.15 (2C), 71.59 (2C), 62.80 (2C), 54.72, 54.05 (2C), 52.74 (2C), 43.56, 18.30 (2C). MS-ESI *calcd* for  $\text{C}_{25}\text{H}_{30}\text{N}_4\text{O}_5$  466.22; found:  $[M+H]^+$ : 467.3.

**Ligand L3:** Piperidone **A** (1 g, 2.6 mmol) was dissolved in methanol, and a second solution consisting of paraformaldehyde (470 mg, 15.7 mmol) and cyclohexylamine (0.9 mL, 7.8 mmol) in methanol was then added. The reaction was stirred and refluxed overnight. A white solid precipitated, which was then filtrated and washed with cold methanol. The remaining solution was recrystallized from methanol and left to evaporate to afford more product, giving a total of 800 mg (61 % yield).  $^1\text{H}$ -NMR (400 MHz, Chloroform-*d*)  $\delta$  8.74 (d,  $J$  = 5.1 Hz, 2H), 8.57 (d,  $J$  = 5.1 Hz, 2H), 8.17 (d,  $J$  = 5.1 Hz, 2H), 7.08 (d,  $J$  = 5.1 Hz, 2H), 4.56 (s, 2H), 3.77 (s, 6H), 3.13 (d,  $J$  = 13.0 Hz, 2H), 2.92 (d,  $J$  = 12.2 Hz, 2H), 2.39 (d,  $J$  = 10.1 Hz, 1H), 2.05 – 1.98 (m, 4H), 1.88 (s, 3H), 1.69 (d,  $J$  = 12.6 Hz, 1H), 1.39 – 1.22 (m, 5H).  $^{13}\text{C}$ -NMR (101 MHz,  $\text{CDCl}_3$ )  $\delta$  203.17, 167.98 (2C), 149.92 (2C), 149.73 (2C), 148.08 (2C), 124.56 (2C), 124.11 (2C), 71.59, 63.82 (2C), 62.94 (2C), 54.45 (2C), 52.70 (2C), 43.53, 28.77 (2C), 26.17 (2C), 26.06. MS-ESI *calcd* for  $\text{C}_{28}\text{H}_{34}\text{N}_4\text{O}_5$  506.25; found:  $[M+H]^+$ : 507.4

**Ligand L5:** Piperidone **A** (500 mg, 1.3 mmol) was dissolved in methanol. A second solution consisting of paraformaldehyde (235 mg, 7.8 mmol) and 4-methoxybenzylamine (0.5 mL, 3.9 mmol) in methanol was then added to the piperidone. The reaction was stirred and refluxed for 6 hours. A white solid precipitated, which was then filtrated and washed with cold methanol, while the remaining solution was left to evaporate to afford more product. Yield 64% (450 mg).  $^1\text{H}$  NMR (400 MHz, Chloroform-*d*)  $\delta$  8.60 (d,  $J$  = 5.4 Hz, 2H), 8.47 (d,  $J$  = 5.4 Hz, 2H), 8.08 (d,  $J$  = 5.4 Hz, 2H), 7.37 – 7.29 (m, 4H), 7.05 (d,  $J$  = 8.6 Hz, 2H), 4.64 (s, 2H), 3.95 (s, 3H), 3.77 (s, 6H), 3.44 (s, 2H), 3.12 (d,  $J$  = 13.4 Hz, 2H), 2.80 (d,  $J$  = 12.5 Hz, 2H), 1.83 (s, 3H).  $^{13}\text{C}$  NMR (101 MHz,  $\text{CDCl}_3$ )  $\delta$  202.86, 167.62 (2C), 159.72, 149.73 (2C), 147.51 (2C), 147.94 (2C), 131.74 (2C), 128.49, 124.22 (4C), 114.23 (2C), 71.76 (2C), 62.65 (2C), 62.08, 57.83 (2C), 55.60, 52.79 (2C), 43.45. MS-ESI *calcd* for  $\text{C}_{30}\text{H}_{32}\text{N}_4\text{O}_6$  544.23; found:  $[M+Na]^+$ : 567.4

**Ligand L6:** Piperidone **A** (500 mg, 1.3 mmol) was suspended in methanol. A second solution consisting of paraformaldehyde (235 mg, 7.8 mmol) and 4-(trifluoromethyl)benzylamine (0.56 mL, 3.9 mmol) in methanol was then added to first solution. The reaction was stirred and refluxed for 5 hours. A white solid precipitated, which was then filtrated and washed with cold methanol, while the remaining solution was left to evaporate to afford more product. 350 mg (46 % yield).  $^1\text{H}$  NMR (400 MHz, Chloroform-*d*)  $\delta$  8.55 (d, 2H), 8.46 (s, 2H), 7.85 (s, 2H), 7.79 (d,  $J$  = 7.8 Hz, 2H), 7.58 (d,  $J$  = 7.8 Hz, 2H), 7.10 (d,  $J$  = 4.7 Hz, 2H), 4.52 (s, 2H), 3.76 (s, 6H), 3.58 (s, 2H), 3.17 (d,  $J$  = 11.2 Hz, 2H), 2.80 (d,  $J$  = 12.3 Hz, 2H), 1.83 (s, 3H).  $^{13}\text{C}$  NMR (101 MHz,  $\text{CDCl}_3$ )  $\delta$  202.36, 167.41 (2C), 149.97 (2C), 149.45 (2C), 147.69 (2C),

140.20, 130.92 (3C), 125.87 (2C), 125.83, 124.26 (2C), 123.82 (2C), 71.71 (2C), 62.58 (2C), 62.28, 57.86 (2C), 52.86 (2C), 43.46. MS-ESI *calcd* for C<sub>30</sub>H<sub>29</sub>F<sub>3</sub>N<sub>4</sub>O<sub>5</sub> 582.21; found: [M+Na]<sup>+</sup>: 605.3

**Ligand L7:** Piperidone **A** (500 mg, 1.3 mmol) was suspended in methanol. A second solution consisting of paraformaldehyde (235 mg, 7.8 mmol) and 4-(trifluoromethoxy)benzylamine (0.6 mL, 3.9 mmol) in methanol was then added to the suspension. The reaction was stirred and refluxed for 4 hours. A white solid precipitated, which was then filtrated and washed with cold methanol, while the remaining solution was left to evaporate to afford more product. 350 mg of **L7** were obtained (45 % yield). <sup>1</sup>H NMR (400 MHz, Chloroform-*d*) δ 8.54 (d, 2H), 8.46 (d, 2H), 7.91 (d, 2H), 7.46 (d, *J* = 8.1 Hz, 2H), 7.36 (d, *J* = 8.0 Hz, 2H), 7.13 (d, *J* = 4.7 Hz, 2H), 4.53 (s, 2H), 3.74 (s, 6H), 3.50 (s, 2H), 3.14 (d, *J* = 12.5 Hz, 2H), 2.77 (d, *J* = 12.4 Hz, 2H), 1.82 (s, 3H). <sup>13</sup>C NMR (101 MHz, CDCl<sub>3</sub>) δ 202.21, 167.39 (2C), 149.33 (4C), 148.63 (3C), 134.86 (2C), 132.00 (2C), 124.59 (2C), 124.20 (2C), 121.35 (2C), 71.71 (2C), 62.54 (2C), 62.06, 57.83 (2C), 52.96 (2C), 43.56. MS-ESI *calcd* for C<sub>30</sub>H<sub>29</sub>F<sub>3</sub>N<sub>4</sub>O<sub>6</sub> 598.20; found: [M+H]<sup>+</sup>: 599.20

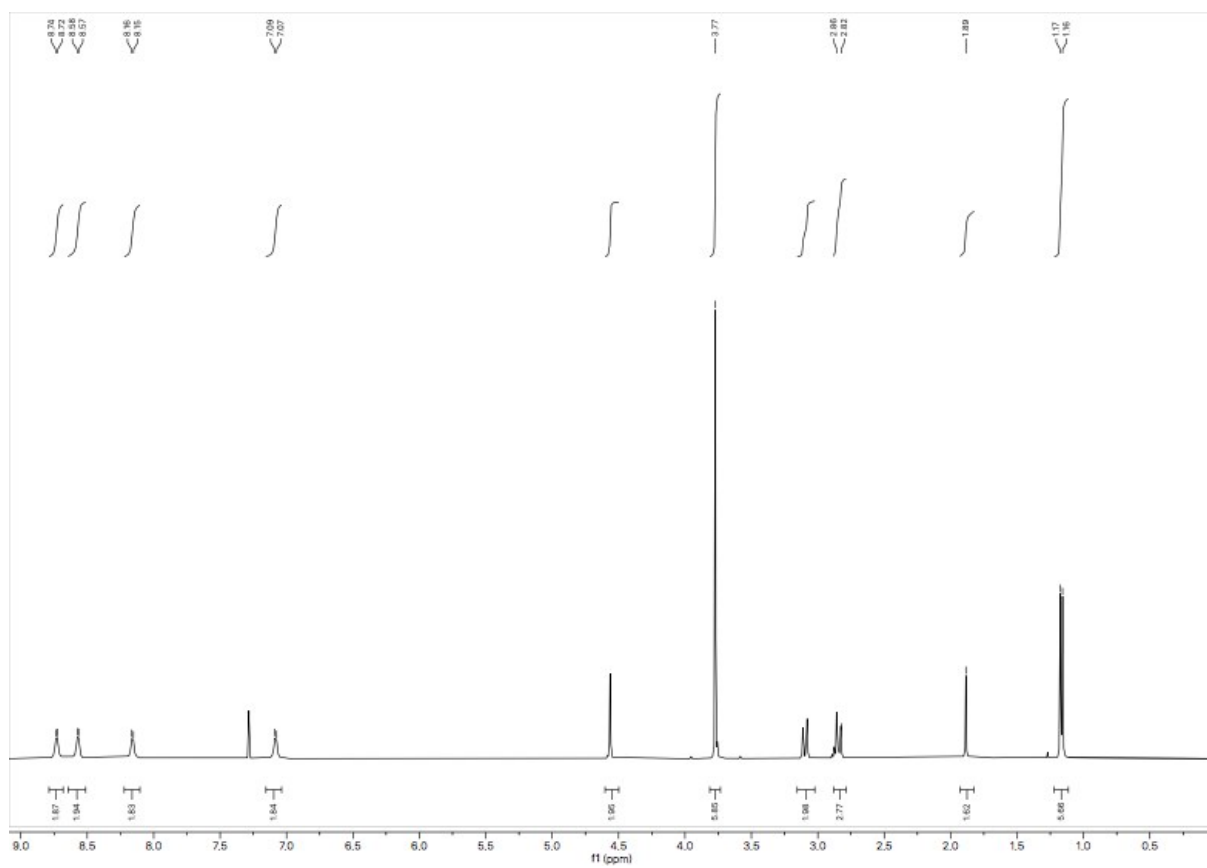

**Figure S1.**  $^1\text{H}$ -NMR spectrum of **L2** in  $\text{CDCl}_3$ .

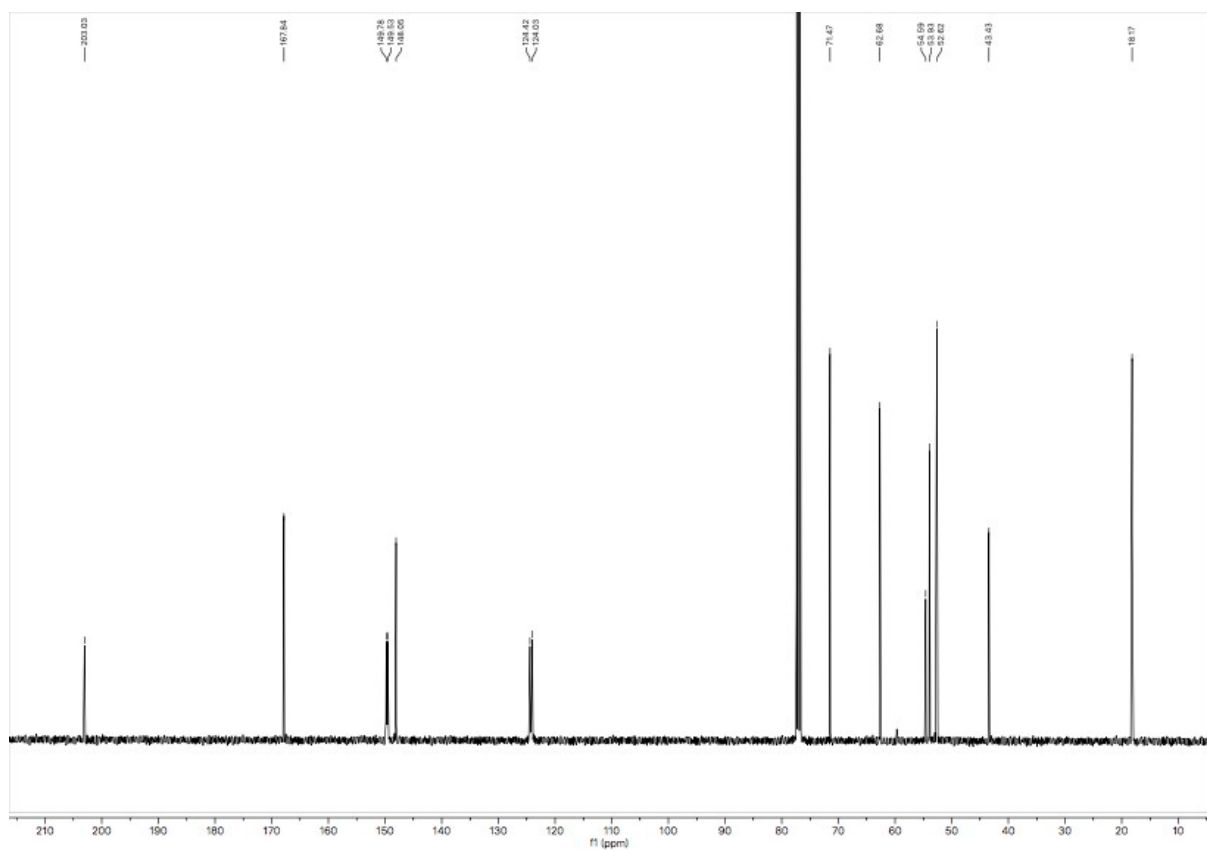

**Figure S2.**  $^{13}\text{C}$ -NMR spectrum of **L2** in  $\text{CDCl}_3$ .

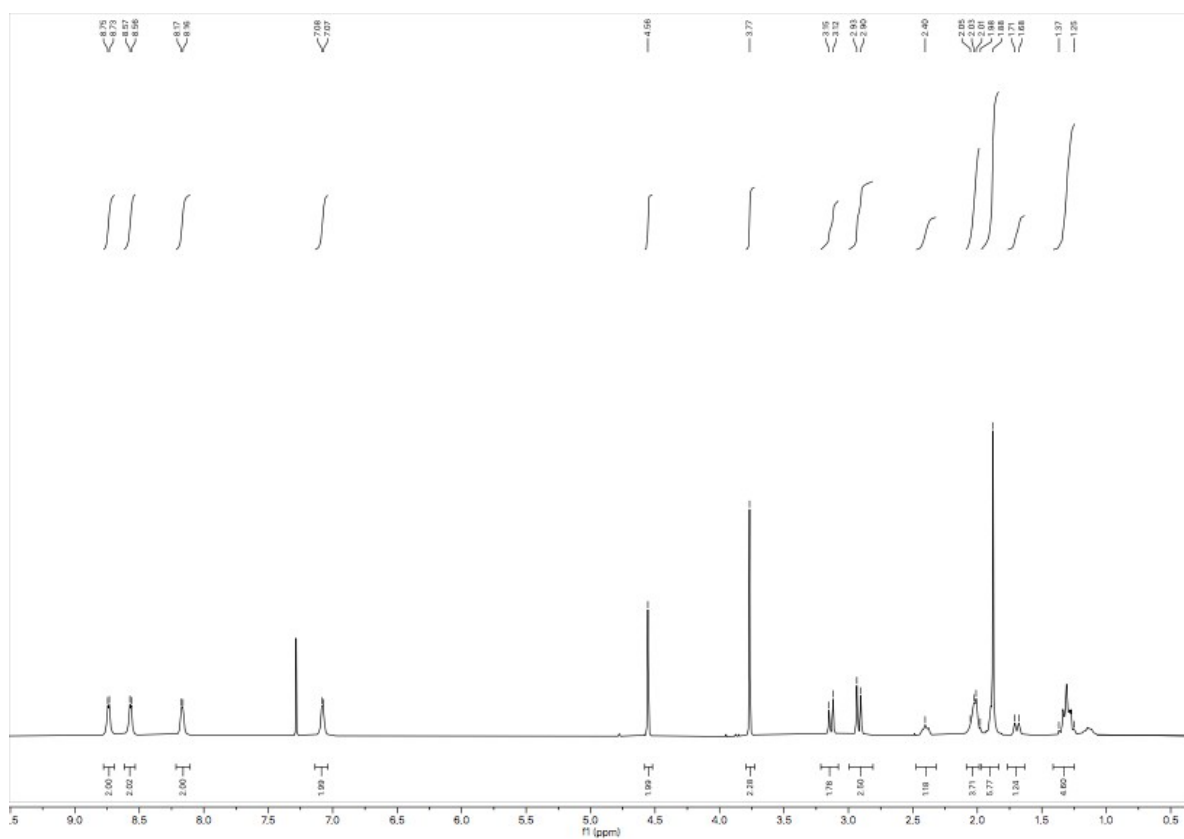

Figure S3.  $^1\text{H}$ -NMR spectrum of **L3** in  $\text{CDCl}_3$ .

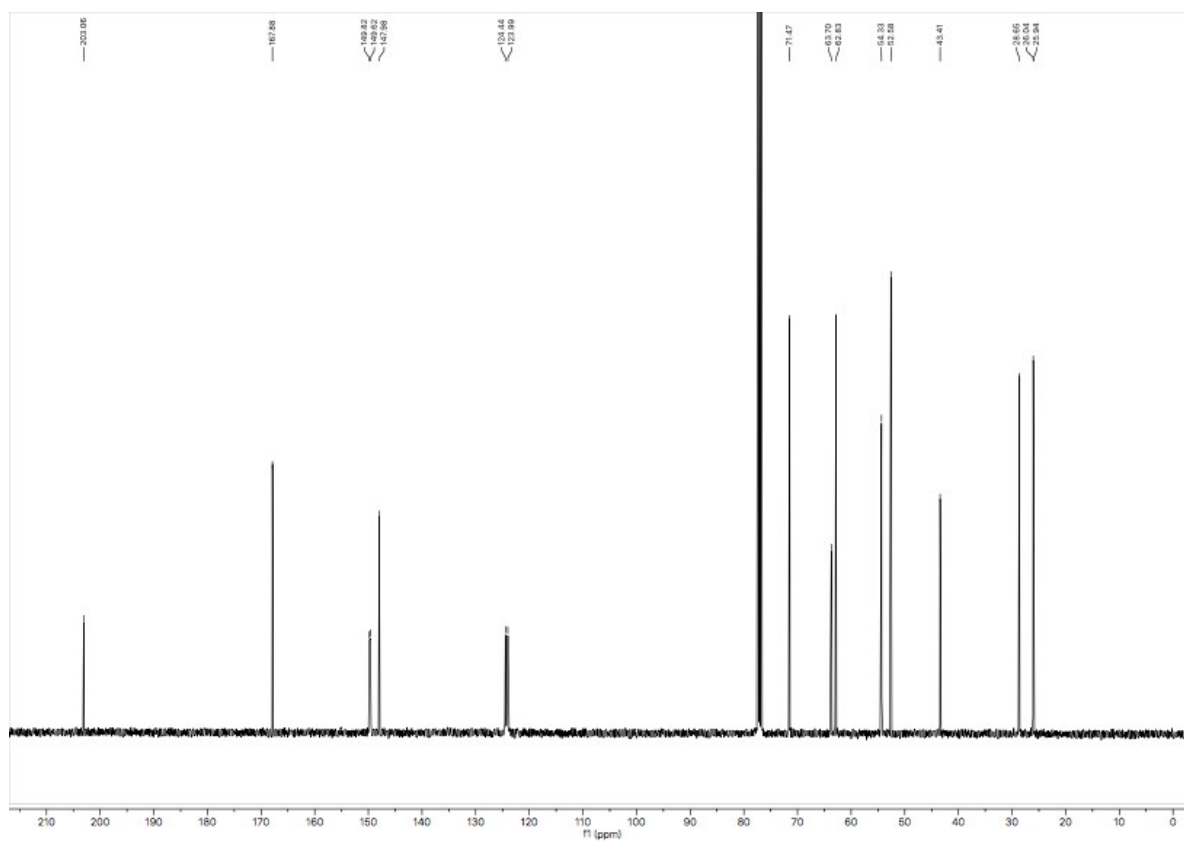

Figure S4.  $^{13}\text{C}$ -NMR spectrum of **L3** in  $\text{CDCl}_3$ .

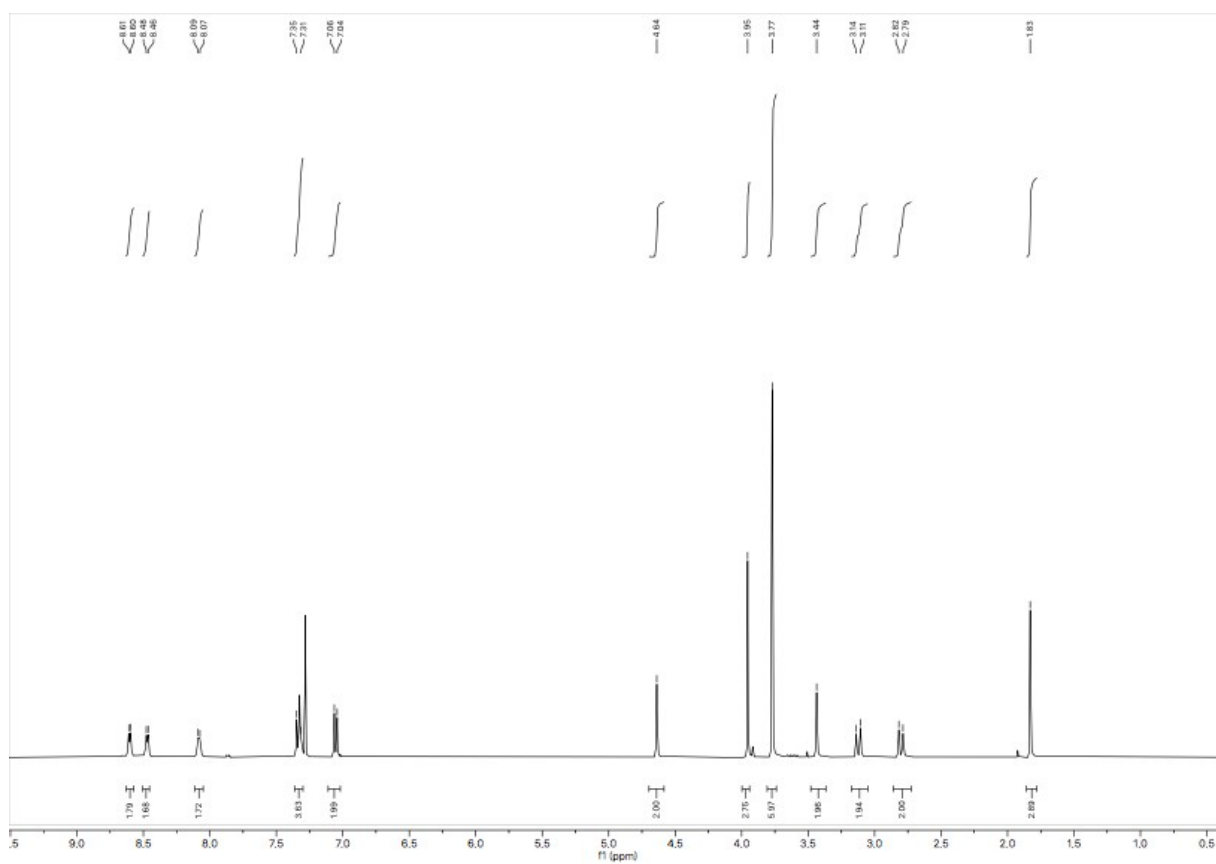

Figure S5.  $^1\text{H-NMR}$  spectrum of **L5** in  $\text{CDCl}_3$ .

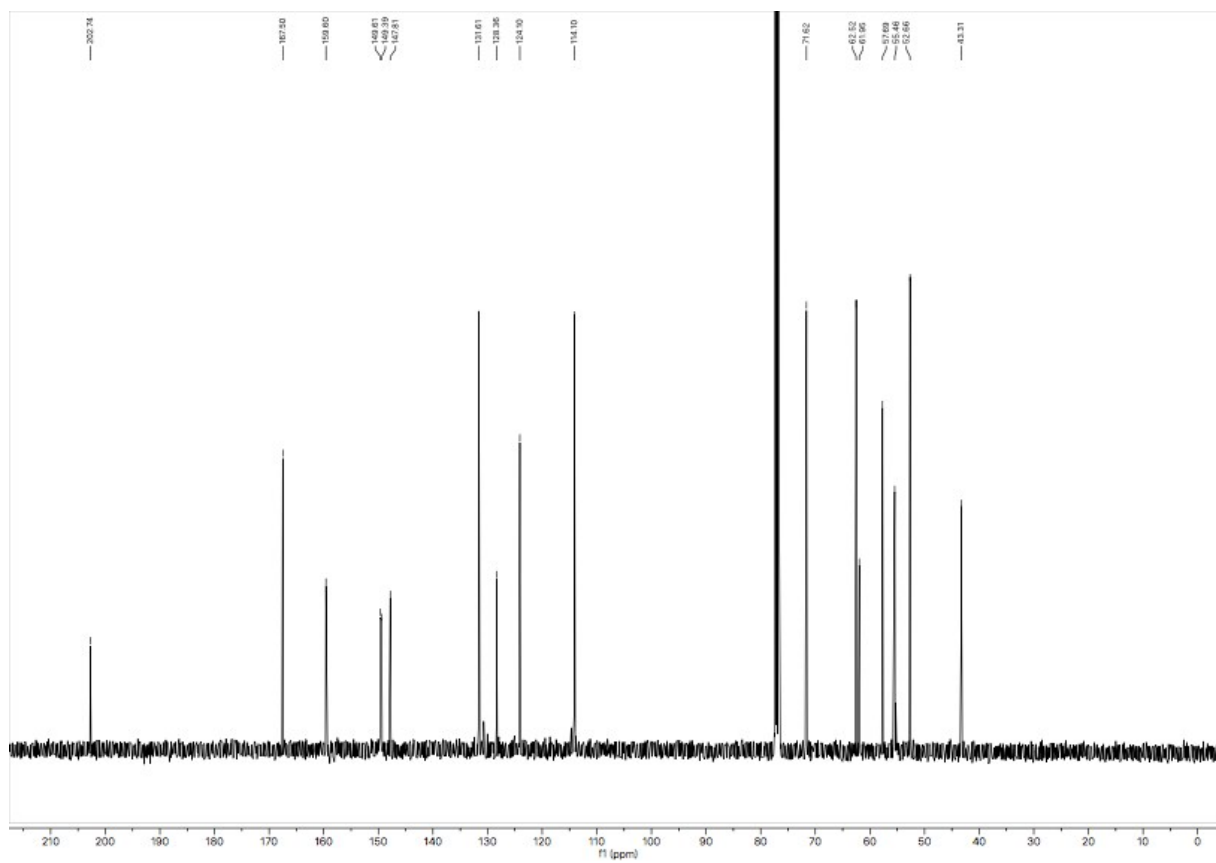

Figure S6.  $^{13}\text{C-NMR}$  spectrum of **L5** in  $\text{CDCl}_3$ .

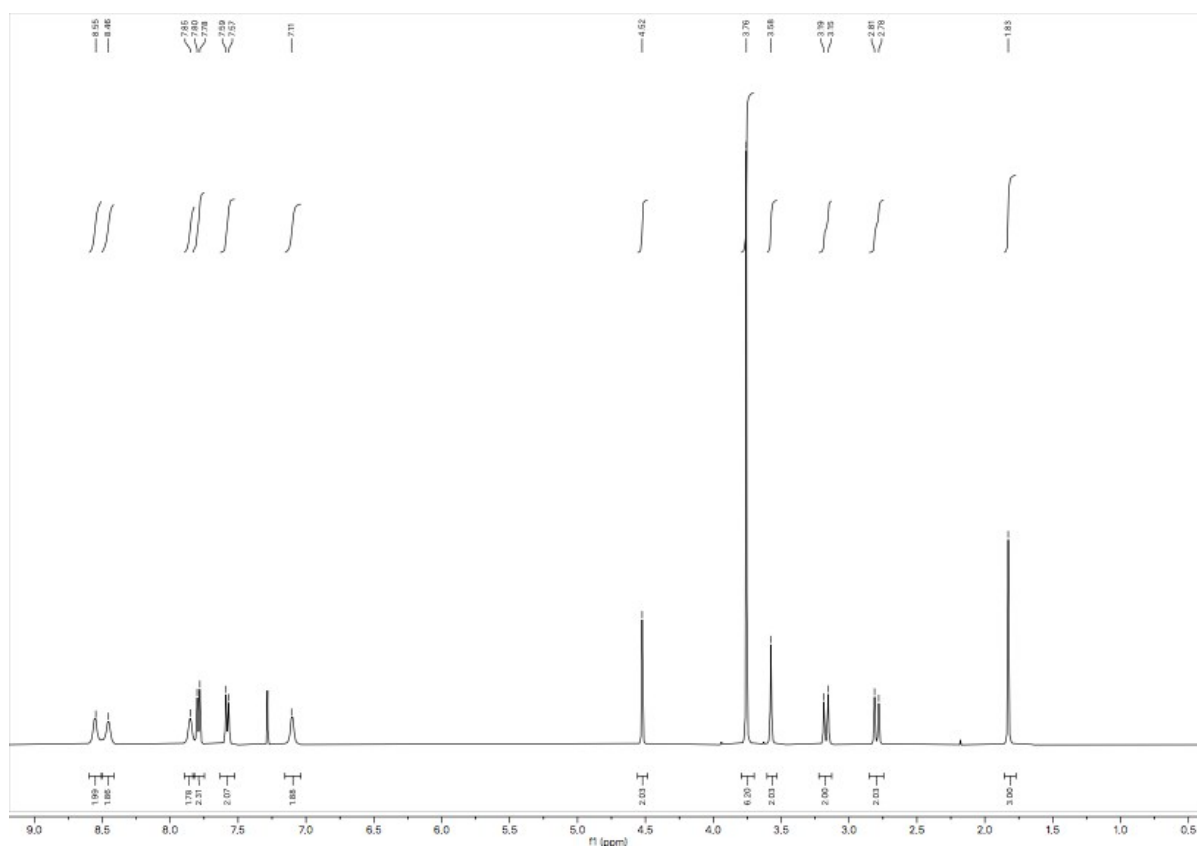

Figure S7.  $^1\text{H}$ -NMR spectrum of **L6** in  $\text{CDCl}_3$ .

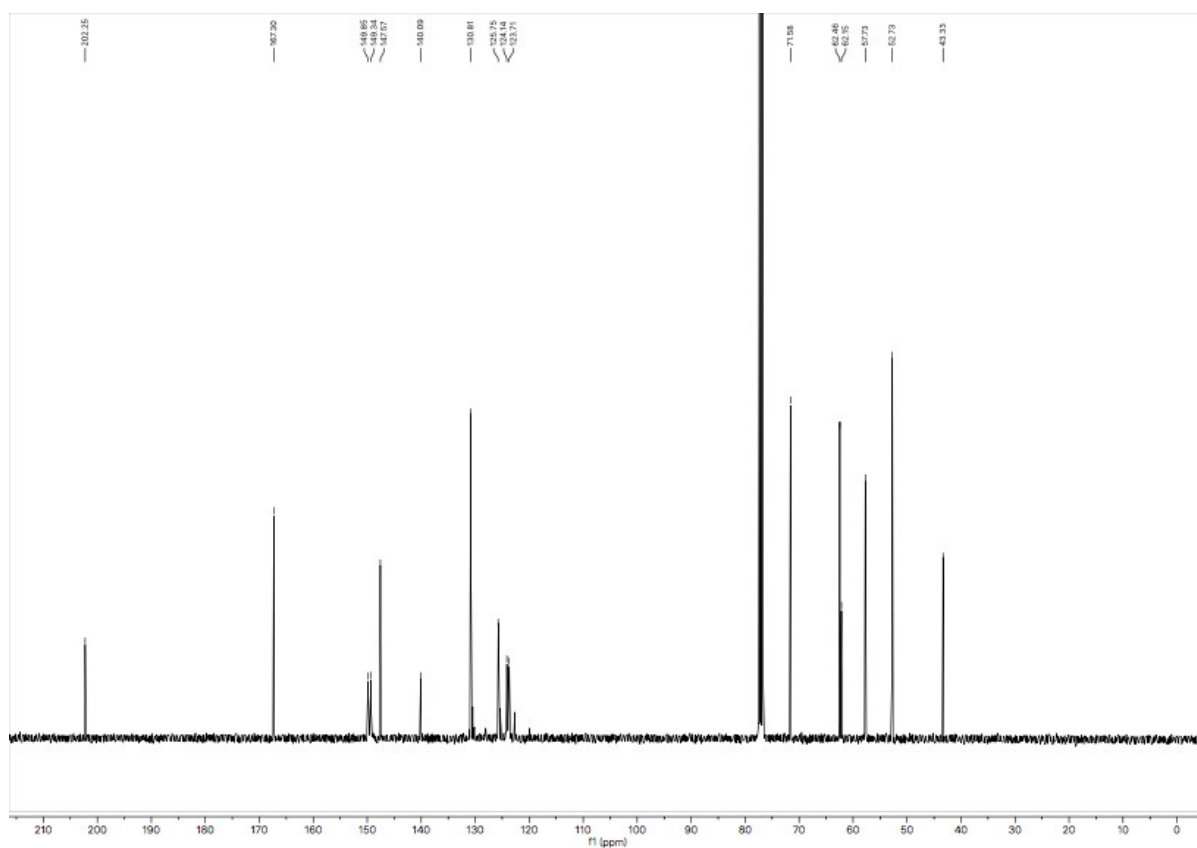

Figure S8.  $^{13}\text{C}$ -NMR spectrum of **L6** in  $\text{CDCl}_3$ .

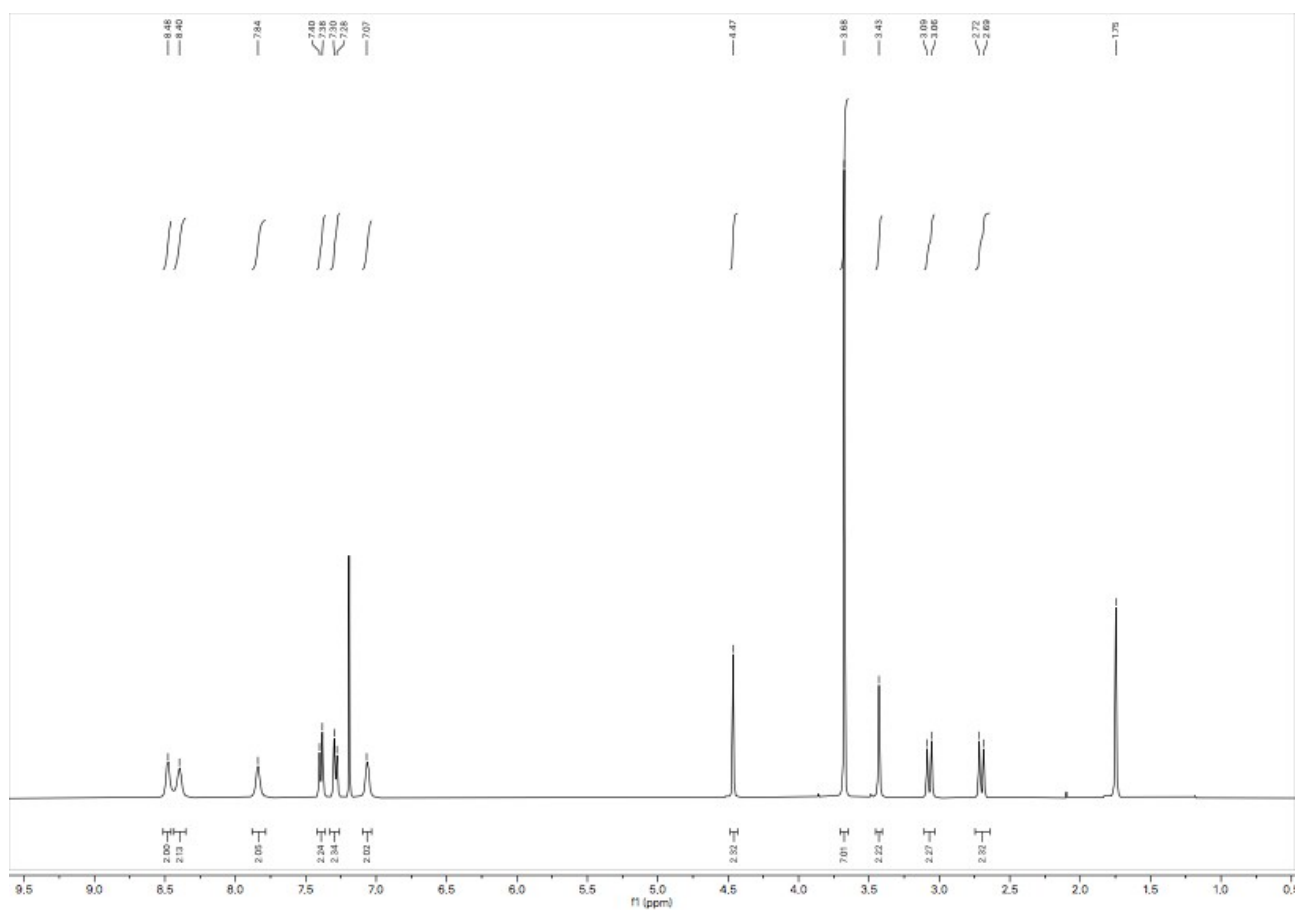

Figure S9.  $^1\text{H}$ -NMR spectrum of **L7** in  $\text{CDCl}_3$ .

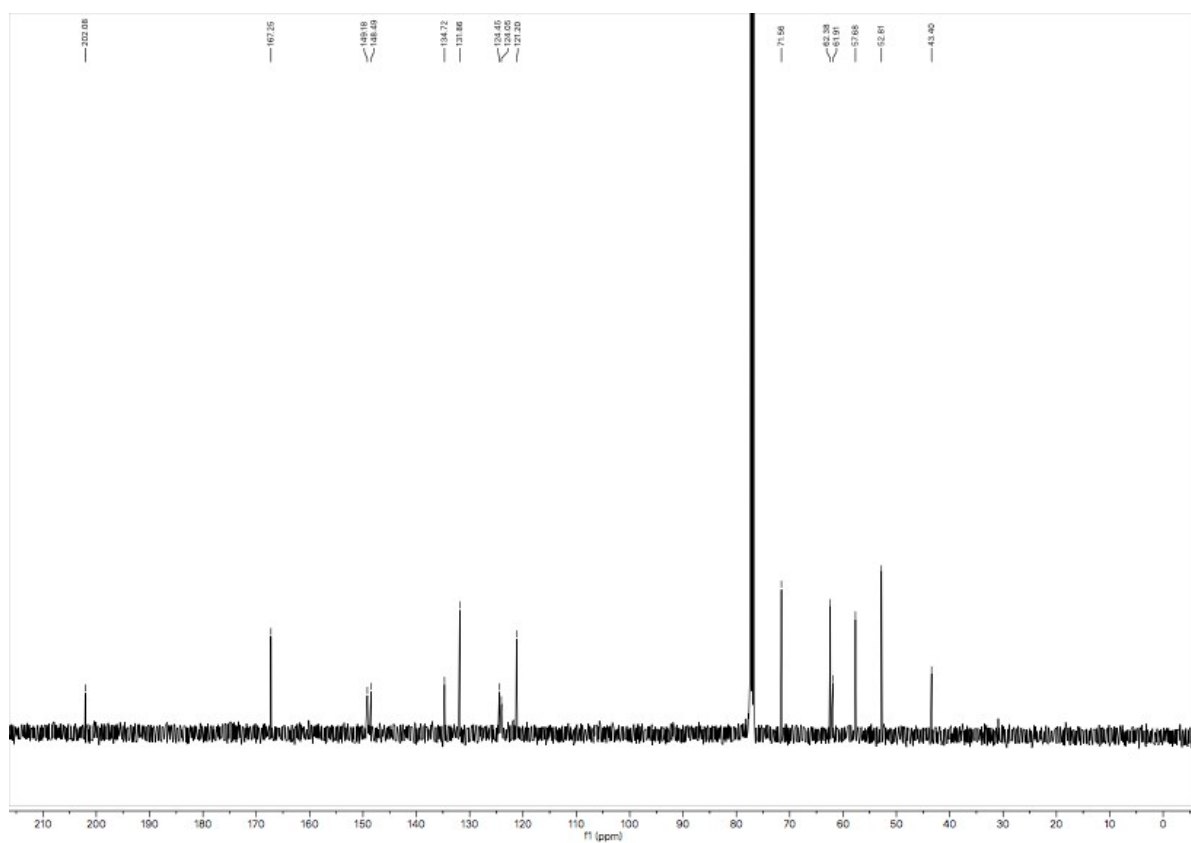

Figure S10.  $^{13}\text{C}$ -NMR spectrum of **L7** in  $\text{CDCl}_3$ .



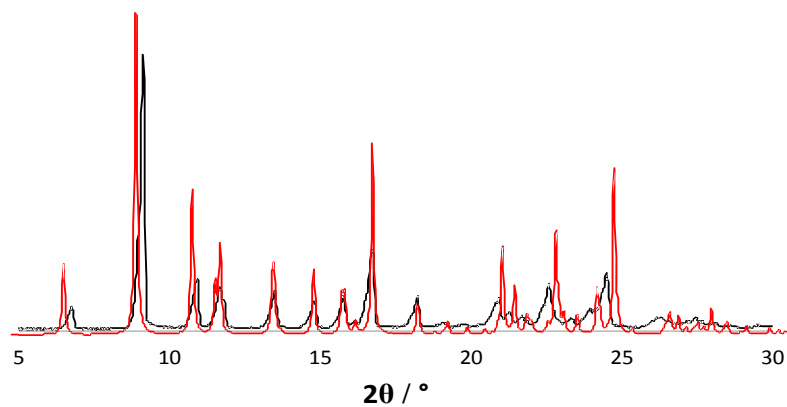

**Figure S11.** X-ray powder diffraction pattern for **L1** (black line) compared to simulated form SC data (red line).

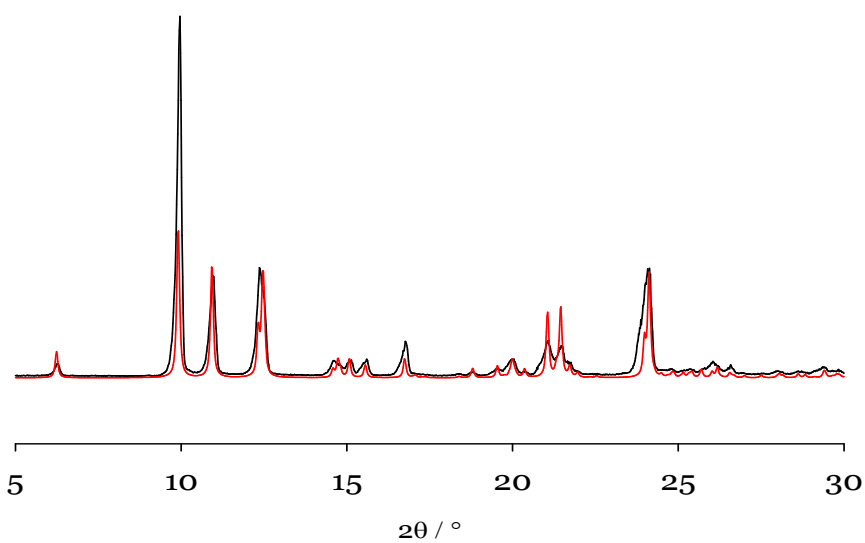

**Figure S12.** X-ray powder diffraction pattern for **L2** (black line) compared to simulated form SC data (red line).

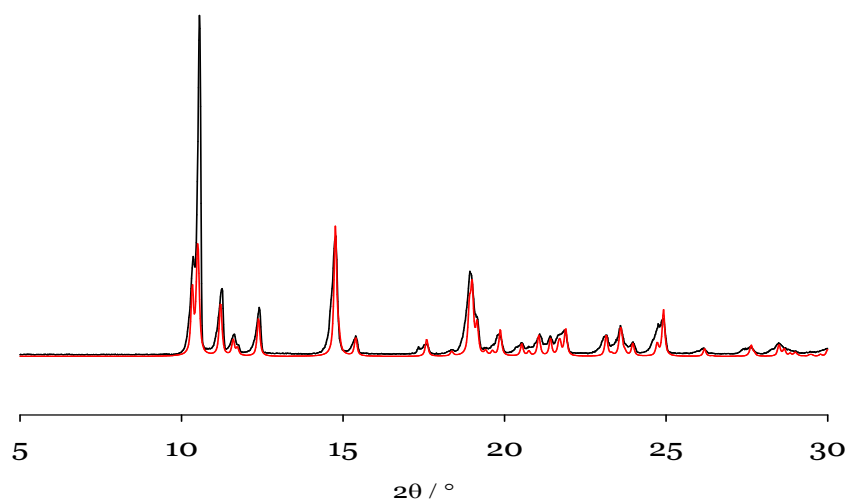

**Figure S13.** X-ray powder diffraction pattern for **L3** (black line) compared to simulated form SC data (red line).

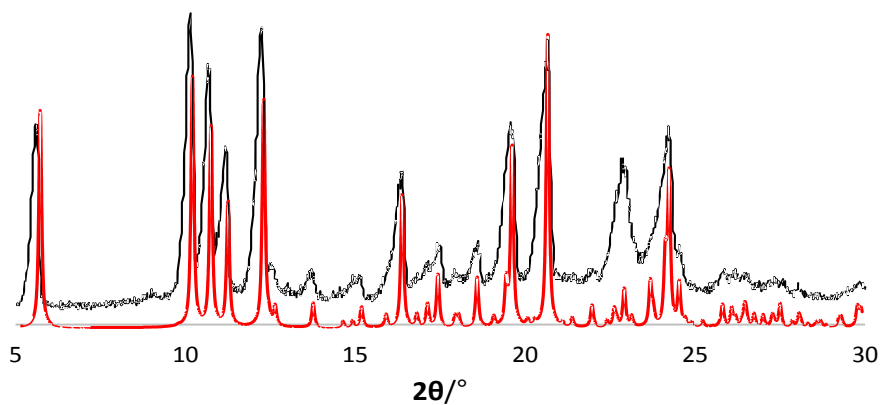

**Figure S14.** X-ray powder diffraction pattern for **L4** (black line) compared to simulated form SC data (red line).

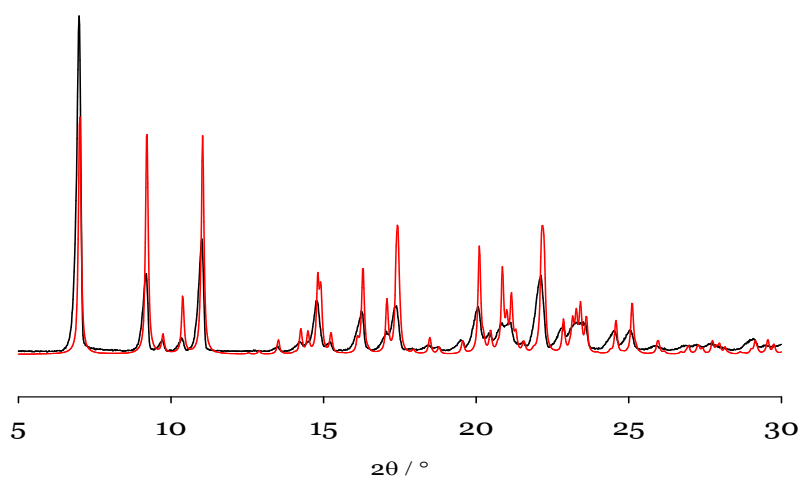

**Figure S15.** X-ray powder diffraction pattern for **L5** (black line) compared to simulated form SC data (red line).

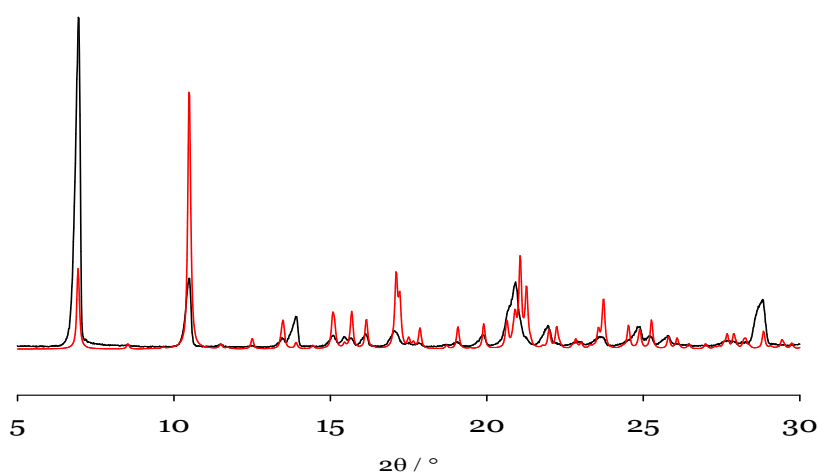

**Figure S16** X-ray powder diffraction pattern for **L6** (black line) compared to simulated form SC data (red line).

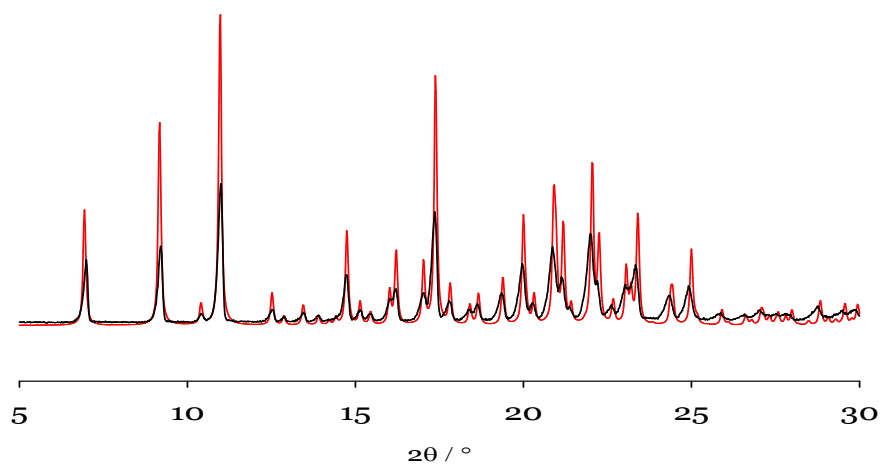

**Figure S17.** X-ray powder diffraction pattern for **L7** (black line) compared to simulated form SC data (red line).

## DFT-CALCULATIONS

Solid-state DFT calculations were performed assuming the GGA PBE functional<sup>1</sup>. A numerical double zeta numerical basis set plus polarisation functions on all atoms (i.e. DNP set, roughly comparable with the usual 6-31G\*\* gaussian contracted basis) centered on atoms has been used. Explicit van der Waals corrections<sup>2</sup> were also included to include important subtle inter and intra-particle interactions.<sup>3</sup> The DMol<sup>3</sup> package<sup>4</sup> was employed for all the solid-state calculations.

In the case of solid-state calculations, fixed experimental X-ray determined unit cells were used while atomic coordinates of all atoms were free to relax maintaining space group symmetry constraints. Lattice energies have been estimated as the difference (normalised by the number of the molecules) between the unit cell (immersed into crystalline architectures) energy and the sum of the energy of the free molecules. Lattice energies were roughly decomposed into van der Waals and dipole components of the interaction by the usage of explicit van der Waals corrections. Geometrical parameters optimised at the PBE/DNP level are listed below in pdb format.

Dipole moments, polarizabilities, volumes and surfaces have been evaluated for isolated molecules assuming the geometrical parameters of solid-state calculations. The corresponding B3LYP/6-31G\*\* calculations have been performed by Gaussian09 suite of programs.<sup>6</sup>

**Table S1.** Summary of the lattice energy,  $E_{\text{dimer}}$  values, their break down into van der Waals,  $E_{\text{vdW}}$  and electrostatic  $E_{\text{electr}}$  terms(kcal/mol), ( $E^* = E_{\text{dimer}} / 2$ ) and Dipole  $\mu$  (D).

|           | $E_{\text{dimer}}$ | $E^*$   | $E_{\text{vdW}}$ | $E_{\text{Electr}}$ | $\mu$   |         |
|-----------|--------------------|---------|------------------|---------------------|---------|---------|
| <b>L1</b> | -125.45            | -62.725 | -81.31           | -44.14              | 0       |         |
| <b>L2</b> | -125.51            | -62.755 | -83.49           | -42.01              | 0       |         |
| <b>L3</b> | -149.42            |         | -93.57           | -55.84              | 6.0765  | Dimer 1 |
|           | -156.34            |         | -96.30           | -60.04              | 4.0319  | Dimer 2 |
|           | -150.61            |         | -93.71           | -56.90              | 5.9315  | Dimer 3 |
| <b>L4</b> | -166.75            |         | -106.25          | -60.49              | 1.6614  | Dimer 1 |
|           | -152.76            |         | -106.25          | -46.51              | 3.9757  | Dimer 2 |
|           | -161.12            | -80.56  | -105.18          | -55.94              | 0       | Dimer 3 |
| <b>L5</b> | -161.31            |         | -102.73          | -58.58              | 4.4619  | Dimer 1 |
|           | -150.23            |         | -96.86           | -53.36              | 1.9313  | Dimer 2 |
|           | -156.50            |         | -98.04           | -58.47              | 3.3153  | Dimer 3 |
| <b>L6</b> | -136.77            | -68.385 | -91.50           | -45.27              | 0       |         |
| <b>L7</b> | -166.05            |         | -109.22          | -56.84              | 13.4777 | Dimer 1 |
|           | -160.01            |         | -103.50          | -56.50              | 10.2553 | Dimer 2 |
|           | -146.05            |         | -98.86           | -47.19              | 5.4034  | Dimer 3 |
|           | -155.80            |         | -103.03          | -52.77              | 5.5904  | Dimer 4 |

## X-ray characterization.

Prism-like colorless single crystals of ligands **L2**, **L3**, **L6** and **L7** and of the **L6** 2:1 complex suitable for SC-XRD are obtained by slow evaporation of a methanol solution at room temperature. A single crystal is glued in a glass fiber and mounted for X-ray diffraction data analysis. The SC-XRD data were recorded at room temperature for **L2** and **L3**, while for **L6** and **L7** at 120 K and 150 K, respectively. The data of the **L6**-complex were also collected at 120K.

Intensity data were collected on a Bruker Apex II CCD diffractometer, using graphite-monochromatized Mo-K $\alpha$  radiation ( $\lambda = 0.71073 \text{ \AA}$ ). Intensity data were corrected for Lorentz-polarization effects and for absorption (SADABS <sup>7</sup>). The structures were solved by direct methods (SIR-97 <sup>8</sup>) and completed by iterative cycles of full-matrix least squares refinement on  $F_o^2$  and  $\Delta F$  synthesis using the SHELXL-18 <sup>9</sup> program (WinGX suite <sup>10</sup>).

The hydrogen atoms bonded to carbon were included at geometrically calculated positions and refined using a riding model. Uiso(H) were defined as 1.2Ueq of the parent carbon atoms for phenyl and methylene residues and 1.5Ueq of the parent carbon atoms for the methyl group. The hydrogen atoms related to the H<sub>2</sub>O molecule in the **L6** dimeric complex were not located. These data can be obtained free of charge via [www.ccdc.cam.ac.uk/conts/retrieving.html](http://www.ccdc.cam.ac.uk/conts/retrieving.html) (or from the Cambridge Crystallographic Data Centre, 12, Union Road, Cambridge CB21EZ, UK; fax: ++44 1223 336 033; or [deposit@ccdc.cam.ac.uk](mailto:deposit@ccdc.cam.ac.uk)). CCDC-1921625 (**L2**), CCDC-1921624 (**L3**), CCDC-1921632 (**L6**), CCDC-1921627 (**L7**) and CCDC-1983773 (**L6**, 2:1 Mn-complex) numbers contain the supplementary crystallographic data for this paper. Crystallographic data were summarized in Tables S2-S7.

**L5**: A block-like colorless single crystal of **L5** was mounted in a nylon loop for single crystal X-ray analysis. Single-crystal XRD data were collected on a Bruker X8 Prospector APEX-II/CCD diffractometer equipped with a microfocusing mirror (Cu-K $\alpha$  radiation,  $\lambda = 1.54178 \text{ \AA}$ ) at room temperature. The structure was determined using direct methods (SHELXTL 97) and refined (based on F2 using all independent data) by full-matrix least-squares methods (SHELX 2014). All non-hydrogen atoms were located from different Fourier maps and refined with anisotropic displacement parameters. Hydrogen atoms were added in riding positions. CCDC-1986612

1. J. P. Perdew, K. Burke and M. E. Ernzerhof, *Phys. Rev. Lett.*, 1996, 77, 3865–3868; (b) J. P. Perdew, K. Burke and M. E. Ernzerhof, *Phys. Rev. Lett.*, 1997, 78, 1396–1396.
2. S. Grimme, *J. Chem. Phys.*, 2006, 124, 34108;
3. a) A. Baggioli, S. V. Meille, G. Raos, R. Po, M. Brinkmann and A. Famulari, *Int. J. Quantum Chem.*, 2013, 113, 2154; b) A. Baggioli and A. Famulari, *Phys. Chem. Chem. Phys.*, 2014, 16, 3983.
4. B. Delley, *J. Chem. Phys.*, 2000, 113, 7756.
5. Gaussian 09, Revision A.02, M. J. Frisch, G. W. Trucks, H. B. Schlegel, G. E. Scuseria, M. A. Robb, J. R. Cheeseman, G. Scalmani, V. Barone, G. A. Petersson, H. Nakatsuji, X. Li, M. Caricato, A. Marenich, J. Bloino, B. G. Janesko, R. Gomperts, B. Mennucci, H. P. Hratchian, J. V. Ortiz, A. F. Izmaylov, J. L. Sonnenberg, D. Williams-Young, F. Ding, F. Lipparini, F. Egidi, J. Goings, B. Peng, A. Petrone, T. Henderson, D. Ranasinghe, V. G. Zakrzewski, J. Gao, N. Rega, G. Zheng, W. Liang, M. Hada, M. Ehara, K. Toyota, R. Fukuda, J. Hasegawa, M. Ishida, T. Nakajima, Y. Honda, O. Kitao, H. Nakai, T. Vreven, K. Throssell, J. A. Montgomery, Jr., J. E. Peralta, F. Ogliaro, M. Bearpark, J. J. Heyd, E. Brothers, K. N. Kudin, V. N. Staroverov, T. Keith, R. Kobayashi, J. Normand, K. Raghavachari, A. Rendell, J. C. Burant, S. S. Iyengar, J. Tomasi, M. Cossi, J. M. Millam, M. Klene, C. Adamo, R. Cammi, J. W. Ochterski, R. L. Martin, K. Morokuma, O. Farkas, J. B. Foresman, and D. J. Fox, Gaussian, Inc., Wallingford CT, 2016.
6. L. J. Farrugia, *J. Appl. Cryst.*, 1999, 32, 837.
7. G. M. Sheldrick, SADABS Area-Detector Absorption Correction Program, Bruker AXS Inc., Madison, WI, USA, 2000.
8. Altomare; M. C. Burla, M. Camalli, G. L. Cascarano, C. Giacovazzo, A. Guagliardi, A. G. G. Moliterni, G. Polidori, R. Spagna, *J. Appl. Cryst.*, 1999, 32, 115.
9. Sheldrick, G. M. *Acta Cryst. C* 2015, 71, 3-8.
10. L. J. Farrugia, *J. Appl. Cryst.*, 2012, 45, 849.

**Table S2:** Crystallographic data of ligand **L2**.

| Parameters                              | L2                                                                                |
|-----------------------------------------|-----------------------------------------------------------------------------------|
| Empirical formula                       | C25 H30 N4 O5                                                                     |
| Formula weight                          | 466.53                                                                            |
| Temperature                             | 294(2) K                                                                          |
| Wavelength                              | 0.710738 Å                                                                        |
| Crystal system                          | Monoclinic                                                                        |
| Space group                             | P 2 <sub>1</sub> /c                                                               |
| Unit cell dimensions                    | $a = 14.548(7)$ Å<br>$b = 11.382(2)$ Å $\beta = 103.41(3)$ °<br>$c = 14.751(3)$ Å |
| Volume                                  | 2375.8(9) Å <sup>3</sup>                                                          |
| Z                                       | 4                                                                                 |
| Density (calculated)                    | 1.304 mg/m <sup>3</sup>                                                           |
| Absorption coefficient                  | 0.082 mm <sup>-1</sup>                                                            |
| F (000)                                 | 992                                                                               |
| Crystal size                            | N/A                                                                               |
| $\theta$ range for data collection      | 1.439 to 31.529°                                                                  |
| Index ranges                            | -21 ≤ h ≤ 21, -16 ≤ k ≤ 16, -21 ≤ l ≤ 21                                          |
| Reflections collected                   | 24216                                                                             |
| Independent reflections                 | 7403 [R(int) = 0.0203]                                                            |
| Completeness to $\theta = 25.242^\circ$ | 99.9%                                                                             |
| Absorption correction                   | N/A                                                                               |
| Refinement method                       | Full-matrix least-squares on F <sup>2</sup>                                       |
| Data / Restraints / Parameters          | 7403 / 0 / 427                                                                    |
| Goodness-of-fit on F <sup>2</sup>       | 1.036                                                                             |
| Final R indices [I > 2σ(I)]             | R1 = 0.0591, wR2 = 0.1473                                                         |
| R indices (all data)                    | R1 = 0.0770, wR2 = 0.1638                                                         |

Largest diff. peak and hole 0.396 and -0.306 e.Å<sup>-3</sup>

**Table S3:** Crystallographic data of ligand **L3**.

| Parameters                              | <b>L3</b>                                                                           |
|-----------------------------------------|-------------------------------------------------------------------------------------|
| Empirical formula                       | C28 H34 N4 O5                                                                       |
| Formula weight                          | 506.59                                                                              |
| Temperature                             | 294(2) K                                                                            |
| Wavelength                              | 0.071073 Å                                                                          |
| Crystal system                          | Monoclinic                                                                          |
| Space group                             | P 2 <sub>1</sub>                                                                    |
| Unit cell dimensions                    | $a = 9.2923(19)$ Å<br>$b = 16.814(3)$ Å $\beta = 114.86(3)$ °<br>$c = 9.4272(12)$ Å |
| Volume                                  | 1336.4(6) Å <sup>3</sup>                                                            |
| Z                                       | 2                                                                                   |
| Density (calculated)                    | 1.259 mg/m <sup>3</sup>                                                             |
| Absorption coefficient                  | 0.087 mm <sup>-1</sup>                                                              |
| F (000)                                 | 534                                                                                 |
| Crystal size                            | N/A                                                                                 |
| $\theta$ range for data collection      | 2.381 to 31.674°                                                                    |
| Index ranges                            | -13 ≤ h ≤ 13, -24 ≤ k ≤ 24, -13 ≤ l ≤ 13                                            |
| Reflections collected                   | 14015                                                                               |
| Independent reflections                 | 7970 [R(int) = 0.0164]                                                              |
| Completeness to $\theta = 25.242^\circ$ | 100.0%                                                                              |
| Absorption correction                   | N/A                                                                                 |
| Refinement method                       | Full-matrix least-squares on F <sup>2</sup>                                         |
| Data / Restraints / Parameters          | 7970 / 0 / 394                                                                      |
| Goodness-of-fit on F <sup>2</sup>       | 1.051                                                                               |
| Final R indices [I > 2σ(I)]             | R1 = 0.0485, wR2 = 0.1192                                                           |
| R indices (all data)                    | R1 = 0.0559, wR2 = 0.1274                                                           |

Largest diff. peak and hole

0.269 and -0.244 e.Å<sup>-3</sup>**Table S4:** Crystallographic data of ligand **L5**.

|                                   |                                                               |          |
|-----------------------------------|---------------------------------------------------------------|----------|
| Empirical formula                 | C <sub>30</sub> H <sub>32</sub> N <sub>4</sub> O <sub>6</sub> |          |
| Formula weight                    | 544.59                                                        |          |
| Temperature                       | 296(2) K                                                      |          |
| Wavelength                        | 1.54178 Å                                                     |          |
| Crystal system                    | Orthorhombic                                                  |          |
| Space group                       | P b c a                                                       |          |
| Unit cell dimensions              | a = 13.089(11) Å                                              | α = 90°. |
|                                   | b = 17.019(14) Å                                              | β = 90°. |
|                                   | c = 25.19(2) Å                                                | γ = 90°. |
| Volume                            | 5611(8) Å <sup>3</sup>                                        |          |
| Z                                 | 8                                                             |          |
| Density (calculated)              | 1.289 Mg/m <sup>3</sup>                                       |          |
| Absorption coefficient            | 0.746 mm <sup>-1</sup>                                        |          |
| F(000)                            | 2304                                                          |          |
| Crystal size                      | 0.100 x 0.100 x 0.050 mm <sup>3</sup>                         |          |
| Theta range for data collection   | 11.426 to 51.052°.                                            |          |
| Index ranges                      | -12 ≤ h ≤ 10, -14 ≤ k ≤ 17, -25 ≤ l ≤ 22                      |          |
| Reflections collected             | 9061                                                          |          |
| Independent reflections           | 2685 [R(int) = 0.2320]                                        |          |
| Completeness to theta = 51.052°   | 88.8 %                                                        |          |
| Refinement method                 | Full-matrix least-squares on F <sup>2</sup>                   |          |
| Data / restraints / parameters    | 2685 / 0 / 365                                                |          |
| Goodness-of-fit on F <sup>2</sup> | 0.976                                                         |          |
| Final R indices [I > 2σ(I)]       | R1 = 0.0667, wR2 = 0.1242                                     |          |
| R indices (all data)              | R1 = 0.1540, wR2 = 0.1527                                     |          |
| Extinction coefficient            | n/a                                                           |          |
| Largest diff. peak and hole       | 0.187 and -0.198 e.Å <sup>-3</sup>                            |          |



**Table S5:** Crystallographic data of ligand **L6**.

| Parameters                              | L6                                                                               |
|-----------------------------------------|----------------------------------------------------------------------------------|
| Empirical formula                       | C30 H29 F3 N4 O5                                                                 |
| Formula weight                          | 582.57                                                                           |
| Temperature                             | 120(2) K                                                                         |
| Wavelength                              | 0.71073 Å                                                                        |
| Crystal system                          | Monoclinic                                                                       |
| Space group                             | P 2 <sub>1</sub> /c                                                              |
| Unit cell dimensions                    | $a = 12.767(3)$ Å<br>$b = 13.128(3)$ Å $\beta = 98.68(3)$ °<br>$c = 16.753(3)$ Å |
| Volume                                  | 2779.0(10) Å <sup>3</sup>                                                        |
| Z                                       | 4                                                                                |
| Density (calculated)                    | 1.392 mg/m <sup>3</sup>                                                          |
| Absorption coefficient                  | 0.109 mm <sup>-1</sup>                                                           |
| F (000)                                 | 1216                                                                             |
| Crystal size                            | N/A                                                                              |
| $\theta$ range for data collection      | 1.612 to 31.644°                                                                 |
| Index ranges                            | -18 ≤ h ≤ 17, -19 ≤ k ≤ 19, -23 ≤ l ≤ 24                                         |
| Reflections collected                   | 31388                                                                            |
| Independent reflections                 | 8757 [R(int) = 0.0185]                                                           |
| Completeness to $\theta = 25.242^\circ$ | 100.0%                                                                           |
| Absorption correction                   | N/A                                                                              |
| Refinement method                       | Full-matrix least-squares on F <sup>2</sup>                                      |
| Data / Restraints / Parameters          | 8757/ 0 / 379                                                                    |
| Goodness-of-fit on F <sup>2</sup>       | 1.058                                                                            |
| Final R indices [ $I > 2\sigma(I)$ ]    | R1 = 0.0517, wR2 = 0.1202                                                        |
| R indices (all data)                    | R1 = 0.0667, wR2 = 0.1299                                                        |

Largest diff. peak and hole

0.56 and -0.57 e.Å<sup>-3</sup>**Table S6:** Crystallographic data of ligand **L7**.

| Parameters                        | <b>L7</b>                                   |
|-----------------------------------|---------------------------------------------|
| Empirical formula                 | C30 H29 F3 N4 O6                            |
| Formula weight                    | 598.20                                      |
| Temperature                       | 150(2) K                                    |
| Wavelength                        | 0.71073 Å                                   |
| Crystal system                    | Orthorhombic                                |
| Space group                       | P b c a                                     |
|                                   | $a = 13.1269(3)$ Å                          |
|                                   | $b = 16.7438(3)$ Å                          |
| Unit cell dimensions              | $c = 25.5484(5)$ Å                          |
| Volume                            | 5615.4(2) Å <sup>3</sup>                    |
| Z                                 | 8                                           |
| Density (calculated)              | 1.42 mg/m <sup>3</sup>                      |
| Absorption coefficient            | 0.113 mm <sup>-1</sup>                      |
| F(000)                            | 2496                                        |
| Crystal size                      | N/A                                         |
| θ range for data collection       | 1.594 to 21.228°                            |
| Index ranges                      | -13 ≤ h ≤ 13, -17 ≤ k ≤ 16, -25 ≤ l ≤ 25    |
| Reflections collected             | 22575                                       |
| Independent reflections           | 3083 [R(int) = 0.0431]                      |
| Completeness to θ = 21.228°       | 100.0%                                      |
| Absorption correction             | N/A                                         |
| Refinement method                 | Full-matrix least-squares on F <sup>2</sup> |
| Data / Restraints / Parameters    | 2122 / 0 / 388                              |
| Goodness-of-fit on F <sup>2</sup> | 1.015                                       |
| Final R indices [I > 2σ(I)]       | R1 = 0.0425, wR2 = 0.0984                   |
| R indices (all data)              | R1 = 0.0734 wR2 = 0.1079                    |

Largest diff. peak and hole

0.49 and -0.41 e.Å<sup>-3</sup>**Table S7:** Crystallographic data of L6 dimeric complex.

| Parameters                        | <b>6·TCM<sup>SC</sup> H<sub>2</sub>O MeOH</b>                                                                  |
|-----------------------------------|----------------------------------------------------------------------------------------------------------------|
| Empirical formula                 | C <sub>32</sub> H <sub>38</sub> Cl <sub>4</sub> F <sub>3</sub> Mn <sub>0.5</sub> N <sub>4</sub> O <sub>8</sub> |
| Formula weight                    | 830.92                                                                                                         |
| Temperature                       | 120(2) K                                                                                                       |
| Wavelength                        | 0.71073 Å                                                                                                      |
| Crystal system                    | Monoclinic                                                                                                     |
| Space group                       | P 2 <sub>1</sub> /n                                                                                            |
| Unit cell dimensions              | $a = 8.3380(17)$ Å<br>$b = 27.317(6)$ Å $\beta = 94.12(3)$ °<br>$c = 16.519(3)$ Å                              |
| Volume                            | 3752.8(13) Å <sup>3</sup>                                                                                      |
| Z                                 | 4                                                                                                              |
| Density (calculated)              | 1.471 mg/m <sup>3</sup>                                                                                        |
| Absorption coefficient            | 0.544 mm <sup>-1</sup>                                                                                         |
| F (000)                           | 1710                                                                                                           |
| Crystal size                      | 0.040 x 0.300 x 0.030 mm <sup>3</sup>                                                                          |
| Θ range for data collection       | 1.443 to 26.371°                                                                                               |
| Index ranges                      | -10 ≤ h ≤ 10, -34 ≤ k ≤ 34, -20 ≤ l ≤ 20                                                                       |
| Reflections collected             | 28376                                                                                                          |
| Independent reflections           | 7686 [R(int) = 0.0258]                                                                                         |
| Completeness to θ = 26.371°       | 100.0%                                                                                                         |
| Refinement method                 | Full-matrix least-squares on F <sup>2</sup>                                                                    |
| Data / Restraints / Parameters    | 7686 / 0 / 477                                                                                                 |
| Goodness-of-fit on F <sup>2</sup> | 1.065                                                                                                          |
| Final R indices [I > 2σ(I)]       | R1 = 0.1022, wR2 = 0.2700                                                                                      |
| R indices (all data)              | R1 = 0.1237, wR2 = 0.2892                                                                                      |
| Largest diff. peak and hole       | 2.22 and -2.33 e.Å <sup>-3</sup>                                                                               |

## Structure L1 (pdb file)

REMARK L1 PDB file

```
CRYST1 8.322 9.858 13.434 85.46 79.77 84.04 P-1
ORIGX1 1.000000 0.000000 0.000000 0.000000
ORIGX2 0.000000 1.000000 0.000000 0.000000
ORIGX3 0.000000 0.000000 1.000000 0.000000
SCALE1 0.120169 -0.012543 -0.020951 0.000000
SCALE2 0.000000 0.101994 -0.006339 0.000000
SCALE3 0.000000 0.000000 0.075786 0.000000
ATOM 1 O5 MOL 2 -0.139 -0.639 8.440 1.00 0.06 O1-
ATOM 2 O2 MOL 2 1.833 4.221 12.358 1.00 0.05 O
ATOM 3 O1 MOL 2 2.252 2.363 13.479 1.00 0.06 O1-
ATOM 4 O3 MOL 2 0.360 1.078 11.482 1.00 0.05 O1-
ATOM 5 O4 MOL 2 0.735 -1.636 10.226 1.00 0.05 O
ATOM 6 C10 MOL 2 3.100 -0.230 9.743 1.00 0.03 C
ATOM 7 H8 MOL 2 3.048 -0.843 10.506 1.00 0.04 H
ATOM 8 N3 MOL 2 4.155 0.757 10.035 1.00 0.03 N
ATOM 9 N4 MOL 2 4.308 -2.595 6.324 1.00 0.06 N1-
ATOM 10 N5 MOL 2 2.433 2.631 8.625 1.00 0.04 N
ATOM 11 C1 MOL 2 -0.193 -2.737 10.057 1.00 0.06 C
ATOM 12 H3 MOL 2 -1.093 -2.411 10.135 1.00 0.09 H
ATOM 13 H1 MOL 2 -0.033 -3.398 10.734 1.00 0.09 H
ATOM 14 H27 MOL 2 -0.069 -3.130 9.190 1.00 0.09 H
ATOM 15 C2 MOL 2 0.653 -0.655 9.331 1.00 0.04 C
ATOM 16 C3 MOL 2 1.695 0.434 9.572 1.00 0.03 C
ATOM 17 C4 MOL 2 3.839 1.643 11.168 1.00 0.03 C
ATOM 18 H22 MOL 2 3.869 1.103 11.985 1.00 0.04 H
ATOM 19 C5 MOL 2 4.915 2.709 11.281 1.00 0.04 C
ATOM 20 C6 MOL 2 5.388 3.397 10.178 1.00 0.05 C
ATOM 21 H23 MOL 2 5.040 3.225 9.333 1.00 0.05 H
ATOM 22 C7 MOL 2 6.382 4.344 10.346 1.00 0.05 C
ATOM 23 H24 MOL 2 6.689 4.795 9.593 1.00 0.06 H
ATOM 24 N1 MOL 2 6.928 4.649 11.527 1.00 0.06 N1-
ATOM 25 C9 MOL 2 3.487 -1.048 8.521 1.00 0.04 C
ATOM 26 C10 MOL 2 3.497 -2.428 8.572 1.00 0.05 C
ATOM 27 H7 MOL 2 3.225 -2.867 9.345 1.00 0.06 H
ATOM 28 C11 MOL 2 3.913 -3.153 7.474 1.00 0.06 C
ATOM 29 H6 MOL 2 3.920 -4.081 7.537 1.00 0.07 H
ATOM 30 C12 MOL 2 4.272 -1.263 6.281 1.00 0.05 C
ATOM 31 H5 MOL 2 4.521 -0.846 5.488 1.00 0.06 H
ATOM 32 C13 MOL 2 3.890 -0.465 7.333 1.00 0.04 C
ATOM 33 H4 MOL 2 3.904 0.461 7.248 1.00 0.05 H
ATOM 34 C14 MOL 2 5.393 0.035 10.359 1.00 0.05 C
ATOM 35 H9 MOL 2 6.095 0.667 10.535 1.00 0.07 H
ATOM 36 H10 MOL 2 5.643 -0.522 9.618 1.00 0.07 H
ATOM 37 H11 MOL 2 5.252 -0.511 11.137 1.00 0.07 H
ATOM 38 C15 MOL 2 2.417 2.293 11.082 1.00 0.03 C
ATOM 39 C16 MOL 2 2.153 2.941 12.440 1.00 0.04 C
ATOM 40 C17 MOL 2 1.548 4.846 13.632 1.00 0.07 C
ATOM 41 H12 MOL 2 0.798 4.408 14.042 1.00 0.10 H
ATOM 42 H14 MOL 2 1.342 5.773 13.495 1.00 0.10 H
ATOM 43 H13 MOL 2 2.315 4.770 14.205 1.00 0.10 H
ATOM 44 C18 MOL 2 2.203 3.277 9.908 1.00 0.04 C
ATOM 45 H21 MOL 2 1.295 3.619 9.936 1.00 0.05 H
ATOM 46 H20 MOL 2 2.808 4.029 10.002 1.00 0.05 H
ATOM 47 C19 MOL 2 1.547 1.486 8.442 1.00 0.04 C
ATOM 48 H15 MOL 2 1.742 1.066 7.590 1.00 0.05 H
ATOM 49 H16 MOL 2 0.628 1.797 8.416 1.00 0.05 H
ATOM 50 C20 MOL 2 2.248 3.584 7.537 1.00 0.06 C
ATOM 51 H18 MOL 2 1.342 3.899 7.537 1.00 0.09 H
ATOM 52 H17 MOL 2 2.438 3.155 6.699 1.00 0.09 H
ATOM 53 H19 MOL 2 2.844 4.327 7.657 1.00 0.09 H
ATOM 54 C21 MOL 2 1.374 1.203 10.846 1.00 0.03 C
ATOM 55 C22 MOL 2 5.486 3.005 12.511 1.00 0.05 C
ATOM 56 H26 MOL 2 5.210 2.561 13.280 1.00 0.06 H
ATOM 57 C23 MOL 2 6.468 3.968 12.573 1.00 0.06 C
ATOM 58 H25 MOL 2 6.835 4.156 13.406 1.00 0.07 H
TER 59
CONECT 1 58
CONECT 2 16
```

CONNECT 3 40 41  
CONNECT 4 40  
CONNECT 5 55  
CONNECT 6 16 12  
CONNECT 7 9 26 17 8  
CONNECT 8 7  
CONNECT 9 7 35 18  
CONNECT 10 31 29  
CONNECT 11 45 51 48  
CONNECT 12 6 13 14 15  
CONNECT 13 12  
CONNECT 14 12  
CONNECT 15 12  
CONNECT 16 2 6 17  
CONNECT 17 7 16 55 48  
CONNECT 18 9 20 39 19  
CONNECT 19 18  
CONNECT 20 18 21 56  
CONNECT 21 20 23 22  
CONNECT 22 21  
CONNECT 23 21 25 24  
CONNECT 24 23  
CONNECT 25 23 58  
CONNECT 26 7 27 33  
CONNECT 27 26 29 28  
CONNECT 28 27  
CONNECT 29 10 27 30  
CONNECT 30 29  
CONNECT 31 10 33 32  
CONNECT 32 31  
CONNECT 33 26 31 34  
CONNECT 34 33  
CONNECT 35 9 36 37 38  
CONNECT 36 35  
CONNECT 37 35  
CONNECT 38 35  
CONNECT 39 18 40 55 45  
CONNECT 40 3 4 39  
CONNECT 41 3 42 43 44  
CONNECT 42 41  
CONNECT 43 41  
CONNECT 44 41  
CONNECT 45 11 39 46 47  
CONNECT 46 45  
CONNECT 47 45  
CONNECT 48 11 17 49 50  
CONNECT 49 48  
CONNECT 50 48  
CONNECT 51 11 52 53 54  
CONNECT 52 51  
CONNECT 53 51  
CONNECT 54 51  
CONNECT 55 5 17 39  
CONNECT 56 20 58 57  
CONNECT 57 56  
CONNECT 58 25 56 1  
END

## Structure L2 (pdb file)

REMARK L2 PDB file

```
CRYST1 14.548 11.382 14.751 90.00 103.41 90.00 P21/C
ORIGX1 1.000000 0.000000 0.000000 0.000000
ORIGX2 0.000000 1.000000 0.000000 0.000000
ORIGX3 0.000000 0.000000 1.000000 0.000000
SCALE1 0.068738 0.000000 0.016388 0.000000
SCALE2 0.000000 0.087858 0.000000 0.000000
SCALE3 0.000000 0.000000 0.069692 0.000000
ATOM 1 C1 MOL 2 5.537 -0.436 16.288 1.00 0.03 C
ATOM 2 C2 MOL 2 5.755 1.006 15.859 1.00 0.03 C
ATOM 3 C3 MOL 2 6.750 1.599 16.881 1.00 0.03 C
ATOM 4 C4 MOL 2 7.786 -0.526 17.212 1.00 0.04 C
ATOM 5 C5 MOL 2 6.841 -1.205 16.190 1.00 0.03 C
ATOM 6 C6 MOL 2 7.302 -1.198 14.690 1.00 0.03 C
ATOM 7 C7 MOL 2 6.225 1.006 14.365 1.00 0.03 C
ATOM 8 C8 MOL 2 6.624 -2.648 16.659 1.00 0.04 C
ATOM 9 C9 MOL 2 4.410 1.736 15.887 1.00 0.04 C
ATOM 10 C10 MOL 2 5.720 -4.750 16.129 1.00 0.07 C
ATOM 11 C11 MOL 2 3.142 3.473 16.813 1.00 0.08 C
ATOM 12 C12 MOL 2 8.899 1.486 17.968 1.00 0.05 C
ATOM 13 C13 MOL 2 10.217 0.766 18.092 1.00 0.09 C
ATOM 14 C14 MOL 2 9.161 2.956 17.681 1.00 0.07 C
ATOM 15 C18 MOL 2 7.614 0.054 12.681 1.00 0.04 C
ATOM 16 C19 MOL 2 6.511 2.430 13.920 1.00 0.03 C
ATOM 17 C20 MOL 2 5.578 3.162 13.206 1.00 0.04 C
ATOM 18 C21 MOL 2 5.893 4.461 12.836 1.00 0.06 C
ATOM 19 C22 MOL 2 7.914 4.355 13.822 1.00 0.05 C
ATOM 20 C23 MOL 2 7.719 3.046 14.218 1.00 0.04 C
ATOM 21 C24 MOL 2 8.632 -1.915 14.535 1.00 0.03 C
ATOM 22 C25 MOL 2 8.705 -3.206 14.041 1.00 0.04 C
ATOM 23 C26 MOL 2 9.948 -3.807 13.910 1.00 0.05 C
ATOM 24 C27 MOL 2 11.015 -1.982 14.708 1.00 0.05 C
ATOM 25 C28 MOL 2 9.829 -1.290 14.862 1.00 0.04 C
ATOM 26 N1 MOL 2 8.029 0.884 16.917 1.00 0.03 N
ATOM 27 N2 MOL 2 7.412 0.164 14.136 1.00 0.03 N
ATOM 28 N3 MOL 2 7.028 5.076 13.140 1.00 0.06 N
ATOM 29 N4 MOL 2 11.099 -3.229 14.241 1.00 0.05 N
ATOM 30 O1 MOL 2 4.515 -0.868 16.754 1.00 0.05 O
ATOM 31 O2 MOL 2 3.492 1.457 15.175 1.00 0.06 O
ATOM 32 O3 MOL 2 4.388 2.737 16.761 1.00 0.06 O
ATOM 33 O4 MOL 2 7.027 -3.082 17.689 1.00 0.08 O
ATOM 34 O5 MOL 2 5.936 -3.367 15.779 1.00 0.05 O
ATOM 35 H6 MOL 2 6.624 -1.698 14.197 1.00 0.03 H
ATOM 36 H7 MOL 2 5.451 0.690 13.854 1.00 0.03 H
ATOM 37 H20 MOL 2 4.725 2.777 12.954 1.00 0.05 H
ATOM 38 H21 MOL 2 5.266 4.974 12.308 1.00 0.08 H
ATOM 39 H22 MOL 2 8.771 4.792 14.082 1.00 0.06 H
ATOM 40 H23 MOL 2 8.395 2.577 14.700 1.00 0.04 H
ATOM 41 H25 MOL 2 7.895 -3.654 13.761 1.00 0.05 H
ATOM 42 H26 MOL 2 10.009 -4.667 13.504 1.00 0.07 H
ATOM 43 H27 MOL 2 11.855 -1.548 14.987 1.00 0.07 H
ATOM 44 H28 MOL 2 9.836 -0.388 15.188 1.00 0.04 H
ATOM 45 H31 MOL 2 6.910 2.534 16.630 1.00 0.04 H
ATOM 46 H32 MOL 2 6.296 1.564 17.760 1.00 0.04 H
ATOM 47 H41 MOL 2 8.611 -1.033 17.201 1.00 0.04 H
ATOM 48 H42 MOL 2 7.368 -0.658 18.101 1.00 0.04 H
ATOM 49 1H18 MOL 2 6.824 -0.353 12.248 1.00 0.07 H
ATOM 50 2H18 MOL 2 7.719 0.899 12.273 1.00 0.06 H
ATOM 51 3H18 MOL 2 8.403 -0.478 12.473 1.00 0.06 H
ATOM 52 0H20 MOL 2 8.414 1.410 18.862 1.00 0.06 H
ATOM 53 0H10 MOL 2 5.243 -5.122 15.353 1.00 0.10 H
ATOM 54 1H10 MOL 2 5.194 -4.803 16.960 1.00 0.10 H
ATOM 55 0H11 MOL 2 2.468 2.880 17.046 1.00 0.09 H
ATOM 56 2H11 MOL 2 3.311 4.154 17.477 1.00 0.10 H
ATOM 57 1H11 MOL 2 2.877 3.813 15.942 1.00 0.09 H
ATOM 58 2H10 MOL 2 6.534 -5.145 16.286 1.00 0.11 H
ATOM 59 3H13 MOL 2 10.790 1.275 18.754 1.00 0.10 H
ATOM 60 1H13 MOL 2 10.682 0.740 17.190 1.00 0.11 H
ATOM 61 3H14 MOL 2 9.838 3.301 18.352 1.00 0.09 H
ATOM 62 1H14 MOL 2 9.596 3.073 16.745 1.00 0.13 H
ATOM 63 2H13 MOL 2 10.173 -0.171 18.410 1.00 0.13 H
```

```
ATOM 64 2H14 MOL 2 8.269 3.551 17.793 1.00 0.12 H
TER 65
CONNECT 1 15
CONNECT 2 31 6 3
CONNECT 3 2 10 4 8
CONNECT 4 3 27 46 47
CONNECT 5 27 6 48 49
CONNECT 6 2 5 9 7
CONNECT 7 6 28 22 36
CONNECT 8 3 28 17 37
CONNECT 9 6 34 35
CONNECT 10 3 32 33
CONNECT 11 35 54 55 59
CONNECT 12 33 56 57 58
CONNECT 13 27 14 15 53
CONNECT 14 13 60 61 64
CONNECT 15 13 62 63 1
CONNECT 16 28 50 51 52
CONNECT 17 8 18 21
CONNECT 18 17 19 38
CONNECT 19 18 29 39
CONNECT 20 29 21 40
CONNECT 21 17 20 41
CONNECT 22 7 23 26
CONNECT 23 22 24 42
CONNECT 24 23 30 43
CONNECT 25 30 26 44
CONNECT 26 22 25 45
CONNECT 27 4 5 13
CONNECT 28 7 8 16
CONNECT 29 19 20
CONNECT 30 24 25
CONNECT 31 2
CONNECT 32 10
CONNECT 33 10 12
CONNECT 34 9
CONNECT 35 9 11
CONNECT 36 7
CONNECT 37 8
CONNECT 38 18
CONNECT 39 19
CONNECT 40 20
CONNECT 41 21
CONNECT 42 23
CONNECT 43 24
CONNECT 44 25
CONNECT 45 26
CONNECT 46 4
CONNECT 47 4
CONNECT 48 5
CONNECT 49 5
CONNECT 50 16
CONNECT 51 16
CONNECT 52 16
CONNECT 53 13
CONNECT 54 11
CONNECT 55 11
CONNECT 56 12
CONNECT 57 12
CONNECT 58 12
CONNECT 59 11
CONNECT 60 14
CONNECT 61 14
CONNECT 62 15
CONNECT 63 15
CONNECT 64 14
END
```

### Structure L3 (pdb file)

```
REMARK L3 PDB file
CRYST1 9.292 16.814 9.427 90.00 114.86 90.00 P21
ORIGX1 1.000000 0.000000 0.000000 0.000000
ORIGX2 0.000000 1.000000 0.000000 0.000000
ORIGX3 0.000000 0.000000 1.000000 0.000000
SCALE1 0.107616 0.000000 0.049862 0.000000
SCALE2 0.000000 0.059474 0.000000 0.000000
SCALE3 0.000000 0.000000 0.116909 0.000000
ATOM 1 N2 MOL 2 -1.861 13.246 1.160 1.00 0.03 N
ATOM 2 O3 MOL 2 -1.430 14.067 -2.875 1.00 0.05 O
ATOM 3 N1 MOL 2 -0.326 15.692 1.528 1.00 0.03 N
ATOM 4 O4 MOL 2 2.911 13.059 1.488 1.00 0.05 O1-
ATOM 5 C2 MOL 2 -0.901 14.727 -0.672 1.00 0.03 C
ATOM 6 O1 MOL 2 1.150 13.778 -1.492 1.00 0.05 O1-
ATOM 7 C4 MOL 2 0.808 14.783 1.668 1.00 0.03 C
ATOM 8 H8A MOL 2 0.919 14.556 2.605 1.00 0.04 H
ATOM 9 H8B MOL 2 1.615 15.233 1.374 1.00 0.04 H
ATOM 10 C1 MOL 2 0.381 13.917 -0.583 1.00 0.03 C
ATOM 11 C5 MOL 2 0.624 13.479 0.847 1.00 0.03 C
ATOM 12 C19 MOL 2 -3.349 14.725 -0.093 1.00 0.03 C
ATOM 13 C12 MOL 2 -0.194 16.935 2.335 1.00 0.04 C
ATOM 14 C6 MOL 2 -0.567 12.560 1.281 1.00 0.03 C
ATOM 15 H13 MOL 2 -0.581 11.781 0.688 1.00 0.03 H
ATOM 16 C24 MOL 2 -0.367 12.066 2.700 1.00 0.03 C
ATOM 17 C7 MOL 2 -2.098 13.866 -0.150 1.00 0.03 C
ATOM 18 5H01 MOL 2 -2.256 13.148 -0.797 1.00 0.04 H
ATOM 19 N3 MOL 2 -5.625 16.368 -0.072 1.00 0.06 N1-
ATOM 20 C28 MOL 2 -0.792 12.784 3.809 1.00 0.04 C
ATOM 21 O2 MOL 2 -1.164 16.236 -2.521 1.00 0.08 O1-
ATOM 22 C25 MOL 2 0.251 10.849 2.941 1.00 0.05 C
ATOM 23 9H01 MOL 2 0.534 10.317 2.233 1.00 0.06 H
ATOM 24 C3 MOL 2 -0.586 16.009 0.141 1.00 0.03 C
ATOM 25 AH02 MOL 2 0.190 16.450 -0.240 1.00 0.04 H
ATOM 26 BH02 MOL 2 -1.336 16.620 0.085 1.00 0.04 H
ATOM 27 C17 MOL 2 -0.423 16.663 3.809 1.00 0.05 C
ATOM 28 C27 MOL 2 -0.578 12.274 5.071 1.00 0.06 C
ATOM 29 2H02 MOL 2 -0.882 12.766 5.800 1.00 0.07 H
ATOM 30 N4 MOL 2 0.042 11.112 5.310 1.00 0.07 N1-
ATOM 31 C9 MOL 2 -1.167 15.125 -2.121 1.00 0.04 C
ATOM 32 C23 MOL 2 -4.248 14.724 -1.147 1.00 0.05 C
ATOM 33 5H02 MOL 2 -4.108 14.179 -1.888 1.00 0.06 H
ATOM 34 C20 MOL 2 -3.629 15.548 0.985 1.00 0.04 C
ATOM 35 C10 MOL 2 3.062 10.762 0.168 1.00 0.05 C
ATOM 36 CH02 MOL 2 3.542 10.875 -0.860 1.00 0.06 H
ATOM 37 C18 MOL 2 -2.933 12.262 1.391 1.00 0.05 C
ATOM 38 DH02 MOL 2 -2.884 11.572 0.725 1.00 0.06 H
ATOM 39 EH02 MOL 2 -3.786 12.699 1.336 1.00 0.06 H
ATOM 40 FH02 MOL 2 -2.829 11.872 2.262 1.00 0.06 H
ATOM 41 C22 MOL 2 -5.361 15.555 -1.078 1.00 0.06 C
ATOM 42 C14 MOL 2 1.099 19.020 2.942 1.00 0.07 C
ATOM 43 C16 MOL 2 -0.419 17.972 4.616 1.00 0.06 C
ATOM 44 C21 MOL 2 -4.758 16.355 0.942 1.00 0.06 C
ATOM 45 C26 MOL 2 0.440 10.436 4.247 1.00 0.07 C
ATOM 46 4H03 MOL 2 0.878 9.628 4.387 1.00 0.08 H
ATOM 47 C15 MOL 2 0.856 18.741 4.411 1.00 0.07 C
ATOM 48 C13 MOL 2 1.099 17.719 2.127 1.00 0.05 C
ATOM 49 C11 MOL 2 -1.652 14.300 -4.276 1.00 0.09 C
ATOM 50 AH03 MOL 2 -2.332 14.970 -4.385 1.00 0.11 H
ATOM 51 BH03 MOL 2 -1.935 13.485 -4.696 1.00 0.11 H
ATOM 52 CH03 MOL 2 -0.837 14.604 -4.683 1.00 0.11 H
ATOM 53 O5 MOL 2 1.854 11.554 0.225 1.00 0.04 O
ATOM 54 C8 MOL 2 1.934 12.691 0.911 1.00 0.03 C
ATOM 55 H1 MOL 2 -1.226 13.603 3.670 1.00 0.04 H
ATOM 56 H10 MOL 2 -3.053 15.568 1.736 1.00 0.04 H
ATOM 57 H11 MOL 2 -4.982 16.949 1.728 1.00 0.06 H
ATOM 58 H12 MOL 2 -5.979 15.536 -1.856 1.00 0.07 H
ATOM 59 AH12 MOL 2 -0.950 17.520 2.070 1.00 0.05 H
ATOM 60 AH17 MOL 2 0.353 16.091 4.191 1.00 0.07 H
ATOM 61 AH16 MOL 2 -1.050 18.529 4.251 1.00 0.05 H
ATOM 62 BH17 MOL 2 -1.351 16.192 3.918 1.00 0.07 H
ATOM 63 BH13 MOL 2 1.216 17.873 1.146 1.00 0.08 H
```



|         |    |      |     |    |        |        |       |      |      |   |
|---------|----|------|-----|----|--------|--------|-------|------|------|---|
| ATOM    | 64 | BH14 | MOL | 2  | 1.927  | 19.538 | 2.720 | 1.00 | 0.08 | H |
| ATOM    | 65 | AH13 | MOL | 2  | 1.847  | 17.133 | 2.472 | 1.00 | 0.09 | H |
| ATOM    | 66 | AH14 | MOL | 2  | 0.234  | 19.555 | 2.643 | 1.00 | 0.07 | H |
| ATOM    | 67 | BH16 | MOL | 2  | -0.566 | 17.772 | 5.594 | 1.00 | 0.08 | H |
| ATOM    | 68 | AH15 | MOL | 2  | 1.698  | 18.159 | 4.739 | 1.00 | 0.09 | H |
| ATOM    | 69 | BH15 | MOL | 2  | 0.818  | 19.588 | 4.953 | 1.00 | 0.09 | H |
| ATOM    | 70 | H    | MOL | 2  | 12.100 | 9.666  | 0.350 | 1.00 | 0.00 | H |
| ATOM    | 71 | H    | MOL | 2  | 13.082 | 11.122 | 0.968 | 1.00 | 0.00 | H |
| TER     | 72 |      |     |    |        |        |       |      |      |   |
| CONNECT | 2  | 18   | 15  | 38 |        |        |       |      |      |   |
| CONNECT | 3  | 32   | 50  |    |        |        |       |      |      |   |
| CONNECT | 4  | 25   | 8   | 14 |        |        |       |      |      |   |
| CONNECT | 5  | 55   |     |    |        |        |       |      |      |   |
| CONNECT | 6  | 11   | 32  | 25 | 18     |        |       |      |      |   |
| CONNECT | 7  | 11   |     |    |        |        |       |      |      |   |
| CONNECT | 8  | 4    | 12  | 9  | 10     |        |       |      |      |   |
| CONNECT | 9  | 8    |     |    |        |        |       |      |      |   |
| CONNECT | 10 | 8    |     |    |        |        |       |      |      |   |
| CONNECT | 11 | 6    | 7   | 12 |        |        |       |      |      |   |
| CONNECT | 12 | 8    | 11  | 55 | 15     |        |       |      |      |   |
| CONNECT | 13 | 35   | 33  | 18 |        |        |       |      |      |   |
| CONNECT | 14 | 4    | 28  | 49 | 60     |        |       |      |      |   |
| CONNECT | 15 | 2    | 12  | 17 | 16     |        |       |      |      |   |
| CONNECT | 16 | 15   |     |    |        |        |       |      |      |   |
| CONNECT | 17 | 15   | 23  | 21 |        |        |       |      |      |   |
| CONNECT | 18 | 2    | 6   | 13 | 19     |        |       |      |      |   |
| CONNECT | 19 | 18   |     |    |        |        |       |      |      |   |
| CONNECT | 20 | 42   | 45  |    |        |        |       |      |      |   |
| CONNECT | 21 | 17   | 29  | 56 |        |        |       |      |      |   |
| CONNECT | 22 | 32   |     |    |        |        |       |      |      |   |
| CONNECT | 23 | 17   | 46  | 24 |        |        |       |      |      |   |
| CONNECT | 24 | 23   |     |    |        |        |       |      |      |   |
| CONNECT | 25 | 4    | 6   | 26 | 27     |        |       |      |      |   |
| CONNECT | 26 | 25   |     |    |        |        |       |      |      |   |
| CONNECT | 27 | 25   |     |    |        |        |       |      |      |   |
| CONNECT | 28 | 14   | 44  | 61 | 63     |        |       |      |      |   |
| CONNECT | 29 | 21   | 31  | 30 |        |        |       |      |      |   |
| CONNECT | 30 | 29   |     |    |        |        |       |      |      |   |
| CONNECT | 31 | 29   | 46  |    |        |        |       |      |      |   |
| CONNECT | 32 | 3    | 6   | 22 |        |        |       |      |      |   |
| CONNECT | 33 | 13   | 42  | 34 |        |        |       |      |      |   |
| CONNECT | 34 | 33   |     |    |        |        |       |      |      |   |
| CONNECT | 35 | 13   | 45  | 57 |        |        |       |      |      |   |
| CONNECT | 36 | 54   | 37  |    |        |        |       |      |      |   |
| CONNECT | 37 | 36   |     |    |        |        |       |      |      |   |
| CONNECT | 38 | 2    | 39  | 40 | 41     |        |       |      |      |   |
| CONNECT | 39 | 38   |     |    |        |        |       |      |      |   |
| CONNECT | 40 | 38   |     |    |        |        |       |      |      |   |
| CONNECT | 41 | 38   |     |    |        |        |       |      |      |   |
| CONNECT | 42 | 20   | 33  | 59 |        |        |       |      |      |   |
| CONNECT | 43 | 48   | 49  | 65 | 67     |        |       |      |      |   |
| CONNECT | 44 | 28   | 48  | 62 | 68     |        |       |      |      |   |
| CONNECT | 45 | 20   | 35  | 58 |        |        |       |      |      |   |
| CONNECT | 46 | 23   | 31  | 47 |        |        |       |      |      |   |
| CONNECT | 47 | 46   |     |    |        |        |       |      |      |   |
| CONNECT | 48 | 43   | 44  | 69 | 70     |        |       |      |      |   |
| CONNECT | 49 | 14   | 43  | 64 | 66     |        |       |      |      |   |
| CONNECT | 50 | 3    | 51  | 52 | 53     |        |       |      |      |   |
| CONNECT | 51 | 50   |     |    |        |        |       |      |      |   |
| CONNECT | 52 | 50   |     |    |        |        |       |      |      |   |
| CONNECT | 53 | 50   |     |    |        |        |       |      |      |   |
| CONNECT | 54 | 36   | 55  |    |        |        |       |      |      |   |
| CONNECT | 55 | 5    | 12  | 54 |        |        |       |      |      |   |
| CONNECT | 56 | 21   |     |    |        |        |       |      |      |   |
| CONNECT | 57 | 35   |     |    |        |        |       |      |      |   |
| CONNECT | 58 | 45   |     |    |        |        |       |      |      |   |
| CONNECT | 59 | 42   |     |    |        |        |       |      |      |   |
| CONNECT | 60 | 14   |     |    |        |        |       |      |      |   |
| CONNECT | 61 | 28   |     |    |        |        |       |      |      |   |
| CONNECT | 62 | 44   |     |    |        |        |       |      |      |   |
| CONNECT | 63 | 28   |     |    |        |        |       |      |      |   |
| CONNECT | 64 | 49   |     |    |        |        |       |      |      |   |

CONECT 65 43  
CONECT 66 49  
CONECT 67 43  
CONECT 68 44  
CONECT 69 48  
CONECT 70 48  
END

## Structure L4 (pdb file)

REMARK L4 PDB file  
CRYST1 16.527 11.175 14.691 90.00 106.39 90.00 P21/C  
ORIGX1 1.000000 0.000000 0.000000 0.000000  
ORIGX2 0.000000 1.000000 0.000000 0.000000  
ORIGX3 0.000000 0.000000 1.000000 0.000000  
SCALE1 0.060506 0.000000 0.017796 0.000000  
SCALE2 0.000000 0.089486 0.000000 0.000000  
SCALE3 0.000000 0.000000 0.070952 0.000000  
ATOM 1 O1 MOL 2 3.476 6.466 11.702 1.00 0.00 O  
ATOM 2 O2 MOL 2 3.691 2.893 11.614 1.00 0.00 O  
ATOM 3 O3 MOL 2 4.521 4.138 13.256 1.00 0.00 O  
ATOM 4 O4 MOL 2 0.991 8.629 10.707 1.00 0.00 O  
ATOM 5 O5 MOL 2 1.999 8.929 12.661 1.00 0.00 O  
ATOM 6 N3 MOL 2 0.007 4.662 11.487 1.00 0.00 N  
ATOM 7 C20 MOL 2 0.641 6.734 13.697 1.00 0.00 C  
ATOM 8 H2 MOL 2 1.260 7.274 14.231 1.00 0.00 H  
ATOM 9 N4 MOL 2 0.609 5.380 14.279 1.00 0.00 N  
ATOM 10 C1 MOL 2 -2.268 2.381 11.684 1.00 0.00 C  
ATOM 11 H29 MOL 2 -2.705 3.078 12.118 1.00 0.00 H  
ATOM 12 C2 MOL 2 -1.279 2.661 10.749 1.00 0.00 C  
ATOM 13 C3 MOL 2 -0.875 4.082 10.456 1.00 0.00 C  
ATOM 14 H26 MOL 2 -0.421 4.109 9.601 1.00 0.00 H  
ATOM 15 H27 MOL 2 -1.674 4.628 10.383 1.00 0.00 H  
ATOM 16 C4 MOL 2 0.218 6.074 11.177 1.00 0.00 C  
ATOM 17 H24 MOL 2 -0.639 6.528 11.157 1.00 0.00 H  
ATOM 18 H25 MOL 2 0.617 6.152 10.297 1.00 0.00 H  
ATOM 19 C5 MOL 2 1.136 6.762 12.217 1.00 0.00 C  
ATOM 20 C6 MOL 2 -0.741 7.352 13.827 1.00 0.00 C  
ATOM 21 C7 MOL 2 -1.886 6.639 13.515 1.00 0.00 C  
ATOM 22 H20 MOL 2 -1.827 5.760 13.217 1.00 0.00 H  
ATOM 23 C8 MOL 2 -3.116 7.250 13.653 1.00 0.00 C  
ATOM 24 H19 MOL 2 -3.874 6.760 13.429 1.00 0.00 H  
ATOM 25 N1 MOL 2 -3.287 8.499 14.086 1.00 0.00 N  
ATOM 26 C10 MOL 2 1.785 4.539 14.035 1.00 0.00 C  
ATOM 27 H13 MOL 2 2.518 4.878 14.590 1.00 0.00 H  
ATOM 28 C11 MOL 2 1.483 3.118 14.476 1.00 0.00 C  
ATOM 29 C12 MOL 2 2.408 2.376 15.184 1.00 0.00 C  
ATOM 30 H7 MOL 2 3.245 2.731 15.382 1.00 0.00 H  
ATOM 31 C13 MOL 2 2.077 1.106 15.594 1.00 0.00 C  
ATOM 32 H6 MOL 2 2.702 0.639 16.098 1.00 0.00 H  
ATOM 33 N2 MOL 2 0.938 0.503 15.324 1.00 0.00 N  
ATOM 34 C15 MOL 2 0.062 1.215 14.635 1.00 0.00 C  
ATOM 35 H4 MOL 2 -0.753 0.815 14.427 1.00 0.00 H  
ATOM 36 C16 MOL 2 0.272 2.514 14.205 1.00 0.00 C  
ATOM 37 H3 MOL 2 -0.390 2.973 13.740 1.00 0.00 H  
ATOM 38 C17 MOL 2 2.262 4.556 12.544 1.00 0.00 C  
ATOM 39 C18 MOL 2 2.450 6.005 12.133 1.00 0.00 C  
ATOM 40 C19 MOL 2 3.618 3.854 12.520 1.00 0.00 C  
ATOM 41 C20 MOL 2 4.965 2.201 11.561 1.00 0.00 C  
ATOM 42 H8 MOL 2 5.647 2.812 11.272 1.00 0.00 H  
ATOM 43 H10 MOL 2 4.906 1.469 10.943 1.00 0.00 H  
ATOM 44 H9 MOL 2 5.183 1.866 12.434 1.00 0.00 H  
ATOM 45 C21 MOL 2 1.284 3.947 11.510 1.00 0.00 C  
ATOM 46 H11 MOL 2 1.687 3.982 10.628 1.00 0.00 H  
ATOM 47 H12 MOL 2 1.125 3.015 11.729 1.00 0.00 H  
ATOM 48 C22 MOL 2 0.456 5.514 15.740 1.00 0.00 C  
ATOM 49 H15 MOL 2 0.360 4.643 16.133 1.00 0.00 H  
ATOM 50 H16 MOL 2 -0.325 6.040 15.933 1.00 0.00 H  
ATOM 51 H14 MOL 2 1.231 5.947 16.105 1.00 0.00 H  
ATOM 52 C23 MOL 2 -2.184 9.159 14.403 1.00 0.00 C  
ATOM 53 H18 MOL 2 -2.275 10.027 14.725 1.00 0.00 H  
ATOM 54 C24 MOL 2 -0.906 8.639 14.289 1.00 0.00 C  
ATOM 55 H17 MOL 2 -0.166 9.154 14.518 1.00 0.00 H  
ATOM 56 C25 MOL 2 1.354 8.197 11.760 1.00 0.00 C  
ATOM 57 C26 MOL 2 2.256 10.299 12.301 1.00 0.00 C  
ATOM 58 H23 MOL 2 2.818 10.326 11.523 1.00 0.00 H  
ATOM 59 H21 MOL 2 2.696 10.745 13.030 1.00 0.00 H  
ATOM 60 H22 MOL 2 1.426 10.741 12.111 1.00 0.00 H  
ATOM 61 C27 MOL 2 -0.671 1.599 10.103 1.00 0.00 C  
ATOM 62 H28 MOL 2 -0.022 1.770 9.460 1.00 0.00 H  
ATOM 63 C28 MOL 2 -1.011 0.280 10.396 1.00 0.00 C

|         |    |      |     |    |        |        |        |      |      |   |
|---------|----|------|-----|----|--------|--------|--------|------|------|---|
| ATOM    | 64 | AH28 | MOL | 2  | -0.591 | -0.424 | 9.956  | 1.00 | 0.00 | H |
| ATOM    | 65 | C10  | MOL | 2  | -1.967 | 0.035  | 11.334 | 1.00 | 0.00 | C |
| ATOM    | 66 | OH10 | MOL | 2  | -2.191 | -0.843 | 11.547 | 1.00 | 0.00 | H |
| ATOM    | 67 | C10  | MOL | 2  | -2.603 | 1.072  | 11.969 | 1.00 | 0.00 | C |
| ATOM    | 68 | 1H10 | MOL | 2  | -3.266 | 0.892  | 12.597 | 1.00 | 0.00 | H |
| TER     | 69 |      |     |    |        |        |        |      |      |   |
| CONNECT | 1  | 68   |     |    |        |        |        |      |      |   |
| CONNECT | 2  | 40   |     |    |        |        |        |      |      |   |
| CONNECT | 3  | 41   | 42  |    |        |        |        |      |      |   |
| CONNECT | 4  | 41   |     |    |        |        |        |      |      |   |
| CONNECT | 5  | 57   |     |    |        |        |        |      |      |   |
| CONNECT | 6  | 57   | 58  |    |        |        |        |      |      |   |
| CONNECT | 7  | 14   | 17  | 46 |        |        |        |      |      |   |
| CONNECT | 8  | 9    | 10  | 20 | 21     |        |        |      |      |   |
| CONNECT | 9  | 8    |     |    |        |        |        |      |      |   |
| CONNECT | 10 | 8    | 27  | 49 |        |        |        |      |      |   |
| CONNECT | 11 | 12   | 13  | 68 |        |        |        |      |      |   |
| CONNECT | 12 | 11   |     |    |        |        |        |      |      |   |
| CONNECT | 13 | 11   | 14  | 62 |        |        |        |      |      |   |
| CONNECT | 14 | 7    | 13  | 15 | 16     |        |        |      |      |   |
| CONNECT | 15 | 14   |     |    |        |        |        |      |      |   |
| CONNECT | 16 | 14   |     |    |        |        |        |      |      |   |
| CONNECT | 17 | 7    | 18  | 19 | 20     |        |        |      |      |   |
| CONNECT | 18 | 17   |     |    |        |        |        |      |      |   |
| CONNECT | 19 | 17   |     |    |        |        |        |      |      |   |
| CONNECT | 20 | 17   | 8   | 40 | 57     |        |        |      |      |   |
| CONNECT | 21 | 8    | 22  | 55 |        |        |        |      |      |   |
| CONNECT | 22 | 21   | 23  | 24 |        |        |        |      |      |   |
| CONNECT | 23 | 22   |     |    |        |        |        |      |      |   |
| CONNECT | 24 | 22   | 25  | 26 |        |        |        |      |      |   |
| CONNECT | 25 | 24   |     |    |        |        |        |      |      |   |
| CONNECT | 26 | 24   | 53  |    |        |        |        |      |      |   |
| CONNECT | 27 | 10   | 28  | 29 | 39     |        |        |      |      |   |
| CONNECT | 28 | 27   |     |    |        |        |        |      |      |   |
| CONNECT | 29 | 27   | 30  | 37 |        |        |        |      |      |   |
| CONNECT | 30 | 29   | 31  | 32 |        |        |        |      |      |   |
| CONNECT | 31 | 30   |     |    |        |        |        |      |      |   |
| CONNECT | 32 | 30   | 33  | 34 |        |        |        |      |      |   |
| CONNECT | 33 | 32   |     |    |        |        |        |      |      |   |
| CONNECT | 34 | 32   | 35  |    |        |        |        |      |      |   |
| CONNECT | 35 | 34   | 36  | 37 |        |        |        |      |      |   |
| CONNECT | 36 | 35   |     |    |        |        |        |      |      |   |
| CONNECT | 37 | 29   | 35  | 38 |        |        |        |      |      |   |
| CONNECT | 38 | 37   |     |    |        |        |        |      |      |   |
| CONNECT | 39 | 27   | 40  | 41 | 46     |        |        |      |      |   |
| CONNECT | 40 | 20   | 39  | 2  |        |        |        |      |      |   |
| CONNECT | 41 | 39   | 4   | 3  |        |        |        |      |      |   |
| CONNECT | 42 | 3    | 43  | 44 | 45     |        |        |      |      |   |
| CONNECT | 43 | 42   |     |    |        |        |        |      |      |   |
| CONNECT | 44 | 42   |     |    |        |        |        |      |      |   |
| CONNECT | 45 | 42   |     |    |        |        |        |      |      |   |
| CONNECT | 46 | 7    | 39  | 47 | 48     |        |        |      |      |   |
| CONNECT | 47 | 46   |     |    |        |        |        |      |      |   |
| CONNECT | 48 | 46   |     |    |        |        |        |      |      |   |
| CONNECT | 49 | 10   | 50  | 51 | 52     |        |        |      |      |   |
| CONNECT | 50 | 49   |     |    |        |        |        |      |      |   |
| CONNECT | 51 | 49   |     |    |        |        |        |      |      |   |
| CONNECT | 52 | 49   |     |    |        |        |        |      |      |   |
| CONNECT | 53 | 26   | 54  | 55 |        |        |        |      |      |   |
| CONNECT | 54 | 53   |     |    |        |        |        |      |      |   |
| CONNECT | 55 | 21   | 53  | 56 |        |        |        |      |      |   |
| CONNECT | 56 | 55   |     |    |        |        |        |      |      |   |
| CONNECT | 57 | 6    | 20  | 5  |        |        |        |      |      |   |
| CONNECT | 58 | 6    | 59  | 60 | 61     |        |        |      |      |   |
| CONNECT | 59 | 58   |     |    |        |        |        |      |      |   |
| CONNECT | 60 | 58   |     |    |        |        |        |      |      |   |
| CONNECT | 61 | 58   |     |    |        |        |        |      |      |   |
| CONNECT | 62 | 13   | 63  | 64 |        |        |        |      |      |   |
| CONNECT | 63 | 62   |     |    |        |        |        |      |      |   |
| CONNECT | 64 | 62   | 65  | 66 |        |        |        |      |      |   |
| CONNECT | 65 | 64   |     |    |        |        |        |      |      |   |
| CONNECT | 66 | 64   | 67  | 68 |        |        |        |      |      |   |

```
CONNECT 67 66  
CONNECT 68 66 11 1  
END
```

## Structure L5 (pdb file)

```
REMARK L5 PDB file
CRYST1 13.089 17.019 25.190 90.00 90.00 90.00 PBCA
ORIGX1 1.000000 0.000000 0.000000 0.000000
ORIGX2 0.000000 1.000000 0.000000 0.000000
ORIGX3 0.000000 0.000000 1.000000 0.000000
SCALE1 0.076400 0.000000 0.000000 0.000000
SCALE2 0.000000 0.058758 0.000000 0.000000
SCALE3 0.000000 0.000000 0.039698 0.000000
ATOM 1 O1 MOL 2 10.109 0.955 5.497 1.00 0.00 O
ATOM 2 N10 MOL 2 13.501 4.992 5.403 1.00 0.00 N
ATOM 3 C40 MOL 2 8.093 7.752 12.441 1.00 0.00 C
ATOM 4 H40 MOL 2 7.690 8.332 13.047 1.00 0.00 H
ATOM 5 N2 MOL 2 7.317 6.915 11.756 1.00 0.00 N
ATOM 6 O5 MOL 2 14.675 6.082 12.595 1.00 0.00 O
ATOM 7 O6 MOL 2 12.173 7.715 13.900 1.00 0.00 O
ATOM 8 O7 MOL 2 12.276 5.594 14.534 1.00 0.00 O
ATOM 9 O8 MOL 2 15.936 4.148 9.900 1.00 0.00 O
ATOM 10 O9 MOL 2 16.034 6.362 10.054 1.00 0.00 O
ATOM 11 N1 MOL 2 11.847 4.008 10.798 1.00 0.00 N
ATOM 12 C10 MOL 2 13.279 6.438 9.478 1.00 0.00 C
ATOM 13 3H10 MOL 2 13.800 7.266 9.549 1.00 0.00 H
ATOM 14 N3 MOL 2 11.891 6.744 9.817 1.00 0.00 N
ATOM 15 C1 MOL 2 7.936 6.083 10.910 1.00 0.00 C
ATOM 16 H1 MOL 2 7.420 5.475 10.431 1.00 0.00 H
ATOM 17 C2 MOL 2 9.297 6.083 10.718 1.00 0.00 C
ATOM 18 H15 MOL 2 9.682 5.488 10.113 1.00 0.00 H
ATOM 19 C3 MOL 2 10.092 6.961 11.420 1.00 0.00 C
ATOM 20 C4 MOL 2 11.584 6.998 11.245 1.00 0.00 C
ATOM 21 H17 MOL 2 11.896 7.899 11.470 1.00 0.00 H
ATOM 22 C5 MOL 2 12.275 5.977 12.223 1.00 0.00 C
ATOM 23 C6 MOL 2 11.753 4.551 12.154 1.00 0.00 C
ATOM 24 H21 MOL 2 12.265 3.993 12.759 1.00 0.00 H
ATOM 25 H22 MOL 2 10.827 4.535 12.442 1.00 0.00 H
ATOM 26 C7 MOL 2 11.259 2.662 10.751 1.00 0.00 C
ATOM 27 H4 MOL 2 10.439 2.658 11.268 1.00 0.00 H
ATOM 28 H11 MOL 2 11.873 2.036 11.165 1.00 0.00 H
ATOM 29 C8 MOL 2 10.963 2.206 9.381 1.00 0.00 C
ATOM 30 C9 MOL 2 9.840 2.665 8.726 1.00 0.00 C
ATOM 31 H10 MOL 2 9.287 3.259 9.179 1.00 0.00 H
ATOM 32 C10 MOL 2 9.483 2.301 7.439 1.00 0.00 C
ATOM 33 H9 MOL 2 8.713 2.639 7.041 1.00 0.00 H
ATOM 34 C11 MOL 2 10.297 1.431 6.769 1.00 0.00 C
ATOM 35 C12 MOL 2 8.910 1.372 4.847 1.00 0.00 C
ATOM 36 H5 MOL 2 8.151 1.026 5.321 1.00 0.00 H
ATOM 37 H2 MOL 2 8.903 1.038 3.945 1.00 0.00 H
ATOM 38 H6 MOL 2 8.870 2.330 4.833 1.00 0.00 H
ATOM 39 C13 MOL 2 12.497 4.699 6.214 1.00 0.00 C
ATOM 40 H30 MOL 2 11.825 4.149 5.879 1.00 0.00 H
ATOM 41 C14 MOL 2 12.366 5.136 7.505 1.00 0.00 C
ATOM 42 H3 MOL 2 11.632 4.888 8.018 1.00 0.00 H
ATOM 43 C15 MOL 2 13.346 5.957 8.030 1.00 0.00 C
ATOM 44 C16 MOL 2 13.927 5.369 10.415 1.00 0.00 C
ATOM 45 C17 MOL 2 13.230 3.972 10.385 1.00 0.00 C
ATOM 46 H24 MOL 2 13.280 3.616 9.484 1.00 0.00 H
ATOM 47 H23 MOL 2 13.716 3.367 10.968 1.00 0.00 H
ATOM 48 C18 MOL 2 11.411 0.946 7.371 1.00 0.00 C
ATOM 49 H7 MOL 2 11.966 0.358 6.911 1.00 0.00 H
ATOM 50 C19 MOL 2 11.733 1.326 8.680 1.00 0.00 C
ATOM 51 H8 MOL 2 12.491 0.967 9.082 1.00 0.00 H
ATOM 52 C20 MOL 2 11.424 7.900 9.032 1.00 0.00 C
ATOM 53 H14 MOL 2 11.956 8.669 9.246 1.00 0.00 H
ATOM 54 H12 MOL 2 10.504 8.078 9.242 1.00 0.00 H
ATOM 55 H13 MOL 2 11.506 7.705 8.095 1.00 0.00 H
ATOM 56 C21 MOL 2 9.448 7.807 12.300 1.00 0.00 C
ATOM 57 H16 MOL 2 9.941 8.416 12.799 1.00 0.00 H
ATOM 58 C22 MOL 2 13.730 5.890 11.837 1.00 0.00 C
ATOM 59 C23 MOL 2 12.229 6.556 13.626 1.00 0.00 C
ATOM 60 C24 MOL 2 12.220 5.992 15.910 1.00 0.00 C
ATOM 61 H19 MOL 2 13.002 6.504 16.127 1.00 0.00 H
ATOM 62 H18 MOL 2 12.183 5.211 16.468 1.00 0.00 H
ATOM 63 H20 MOL 2 11.436 6.527 16.057 1.00 0.00 H
```

|         |    |     |     |    |        |       |        |      |      |   |
|---------|----|-----|-----|----|--------|-------|--------|------|------|---|
| ATOM    | 64 | C25 | MOL | 2  | 15.401 | 5.204 | 10.096 | 1.00 | 0.00 | C |
| ATOM    | 65 | C26 | MOL | 2  | 17.461 | 6.275 | 9.799  | 1.00 | 0.00 | C |
| ATOM    | 66 | H25 | MOL | 2  | 17.850 | 5.617 | 10.381 | 1.00 | 0.00 | H |
| ATOM    | 67 | H26 | MOL | 2  | 17.868 | 7.129 | 9.965  | 1.00 | 0.00 | H |
| ATOM    | 68 | H27 | MOL | 2  | 17.609 | 6.022 | 8.885  | 1.00 | 0.00 | H |
| ATOM    | 69 | C27 | MOL | 2  | 14.394 | 6.283 | 7.207  | 1.00 | 0.00 | C |
| ATOM    | 70 | H29 | MOL | 2  | 15.077 | 6.834 | 7.515  | 1.00 | 0.00 | H |
| ATOM    | 71 | C28 | MOL | 2  | 14.425 | 5.788 | 5.912  | 1.00 | 0.00 | C |
| ATOM    | 72 | H28 | MOL | 2  | 15.141 | 6.031 | 5.367  | 1.00 | 0.00 | H |
| TER     | 73 |     |     |    |        |       |        |      |      |   |
| CONNECT | 1  | 72  |     |    |        |       |        |      |      |   |
| CONNECT | 2  | 35  | 36  |    |        |       |        |      |      |   |
| CONNECT | 3  | 40  | 72  |    |        |       |        |      |      |   |
| CONNECT | 4  | 5   | 6   | 57 |        |       |        |      |      |   |
| CONNECT | 5  | 4   |     |    |        |       |        |      |      |   |
| CONNECT | 6  | 4   | 16  |    |        |       |        |      |      |   |
| CONNECT | 7  | 59  |     |    |        |       |        |      |      |   |
| CONNECT | 8  | 60  |     |    |        |       |        |      |      |   |
| CONNECT | 9  | 60  | 61  |    |        |       |        |      |      |   |
| CONNECT | 10 | 65  |     |    |        |       |        |      |      |   |
| CONNECT | 11 | 65  | 66  |    |        |       |        |      |      |   |
| CONNECT | 12 | 24  | 27  | 46 |        |       |        |      |      |   |
| CONNECT | 13 | 14  | 15  | 44 | 45     |       |        |      |      |   |
| CONNECT | 14 | 13  |     |    |        |       |        |      |      |   |
| CONNECT | 15 | 13  | 21  | 53 |        |       |        |      |      |   |
| CONNECT | 16 | 6   | 17  | 18 |        |       |        |      |      |   |
| CONNECT | 17 | 16  |     |    |        |       |        |      |      |   |
| CONNECT | 18 | 16  | 19  | 20 |        |       |        |      |      |   |
| CONNECT | 19 | 18  |     |    |        |       |        |      |      |   |
| CONNECT | 20 | 18  | 21  | 57 |        |       |        |      |      |   |
| CONNECT | 21 | 20  | 15  | 22 | 23     |       |        |      |      |   |
| CONNECT | 22 | 21  |     |    |        |       |        |      |      |   |
| CONNECT | 23 | 21  | 24  | 59 | 60     |       |        |      |      |   |
| CONNECT | 24 | 12  | 23  | 25 | 26     |       |        |      |      |   |
| CONNECT | 25 | 24  |     |    |        |       |        |      |      |   |
| CONNECT | 26 | 24  |     |    |        |       |        |      |      |   |
| CONNECT | 27 | 12  | 28  | 29 | 30     |       |        |      |      |   |
| CONNECT | 28 | 27  |     |    |        |       |        |      |      |   |
| CONNECT | 29 | 27  |     |    |        |       |        |      |      |   |
| CONNECT | 30 | 27  | 31  | 51 |        |       |        |      |      |   |
| CONNECT | 31 | 30  | 32  | 33 |        |       |        |      |      |   |
| CONNECT | 32 | 31  |     |    |        |       |        |      |      |   |
| CONNECT | 33 | 31  | 34  | 35 |        |       |        |      |      |   |
| CONNECT | 34 | 33  |     |    |        |       |        |      |      |   |
| CONNECT | 35 | 2   | 33  | 49 |        |       |        |      |      |   |
| CONNECT | 36 | 2   | 37  | 38 | 39     |       |        |      |      |   |
| CONNECT | 37 | 36  |     |    |        |       |        |      |      |   |
| CONNECT | 38 | 36  |     |    |        |       |        |      |      |   |
| CONNECT | 39 | 36  |     |    |        |       |        |      |      |   |
| CONNECT | 40 | 3   | 41  | 42 |        |       |        |      |      |   |
| CONNECT | 41 | 40  |     |    |        |       |        |      |      |   |
| CONNECT | 42 | 40  | 43  | 44 |        |       |        |      |      |   |
| CONNECT | 43 | 42  |     |    |        |       |        |      |      |   |
| CONNECT | 44 | 42  | 13  | 70 |        |       |        |      |      |   |
| CONNECT | 45 | 13  | 46  | 59 | 65     |       |        |      |      |   |
| CONNECT | 46 | 45  | 12  | 47 | 48     |       |        |      |      |   |
| CONNECT | 47 | 46  |     |    |        |       |        |      |      |   |
| CONNECT | 48 | 46  |     |    |        |       |        |      |      |   |
| CONNECT | 49 | 35  | 50  | 51 |        |       |        |      |      |   |
| CONNECT | 50 | 49  |     |    |        |       |        |      |      |   |
| CONNECT | 51 | 49  | 30  | 52 |        |       |        |      |      |   |
| CONNECT | 52 | 51  |     |    |        |       |        |      |      |   |
| CONNECT | 53 | 15  | 54  | 55 | 56     |       |        |      |      |   |
| CONNECT | 54 | 53  |     |    |        |       |        |      |      |   |
| CONNECT | 55 | 53  |     |    |        |       |        |      |      |   |
| CONNECT | 56 | 53  |     |    |        |       |        |      |      |   |
| CONNECT | 57 | 20  | 4   | 58 |        |       |        |      |      |   |
| CONNECT | 58 | 57  |     |    |        |       |        |      |      |   |
| CONNECT | 59 | 23  | 45  | 7  |        |       |        |      |      |   |
| CONNECT | 60 | 8   | 23  | 9  |        |       |        |      |      |   |
| CONNECT | 61 | 9   | 62  | 63 | 64     |       |        |      |      |   |
| CONNECT | 62 | 61  |     |    |        |       |        |      |      |   |

```
CONNECT 63 61
CONNECT 64 61
CONNECT 65 10 11 45
CONNECT 66 11 67 68 69
CONNECT 67 66
CONNECT 68 66
CONNECT 69 66
CONNECT 70 44 71 72
CONNECT 71 70
CONNECT 72 3 70 1
END
```



## Structure L6 (pdb file)

REMARK L6 PDB file  
CRYST1 12.874 13.172 16.965 90.00 98.68 90.00 P21/C  
ORIGX1 1.000000 0.000000 0.000000 0.000000  
ORIGX2 0.000000 1.000000 0.000000 0.000000  
ORIGX3 0.000000 0.000000 1.000000 0.000000  
SCALE1 0.077676 0.000000 0.011858 0.000000  
SCALE2 0.000000 0.075919 0.000000 0.000000  
SCALE3 0.000000 0.000000 0.059628 0.000000  
ATOM 1 C1 UNK C 1 11.302 0.721 5.653 1.00 2.10 C  
ATOM 2 C2 UNK C 1 11.679 -0.745 5.789 1.00 2.04 C  
ATOM 3 C3 UNK C 1 11.822 -1.288 4.350 1.00 2.24 C  
ATOM 4 H3A UNK C 1 12.519 -0.796 3.889 1.00 2.69 H  
ATOM 5 H3B UNK C 1 12.087 -2.221 4.384 1.00 2.69 H  
ATOM 6 C4 UNK C 1 10.163 0.235 3.525 1.00 2.28 C  
ATOM 7 H4A UNK C 1 9.328 0.297 3.036 1.00 2.74 H  
ATOM 8 H4B UNK C 1 10.833 0.735 3.034 1.00 2.74 H  
ATOM 9 C5 UNK C 1 9.979 0.871 4.924 1.00 2.05 C  
ATOM 10 C6 UNK C 1 8.877 0.209 5.812 1.00 2.10 C  
ATOM 11 H6 UNK C 1 8.776 0.741 6.628 1.00 2.52 H  
ATOM 12 C7 UNK C 1 10.580 -1.444 6.647 1.00 2.15 C  
ATOM 13 H7 UNK C 1 10.665 -1.124 7.570 1.00 2.58 H  
ATOM 14 C8 UNK C 1 9.700 2.366 4.743 1.00 2.66 C  
ATOM 15 C9 UNK C 1 13.022 -0.807 6.533 1.00 2.60 C  
ATOM 16 C10 UNK C 1 9.164 4.373 5.866 1.00 4.75 C  
ATOM 17 AH10 UNK C 1 10.009 4.813 5.749 1.00 5.71 H  
ATOM 18 BH10 UNK C 1 8.769 4.655 6.695 1.00 5.71 H  
ATOM 19 CH10 UNK C 1 8.580 4.602 5.140 1.00 5.71 H  
ATOM 20 C11 UNK C 1 15.358 -0.755 6.253 1.00 5.40 C  
ATOM 21 AH11 UNK C 1 15.540 0.042 6.756 1.00 6.48 H  
ATOM 22 BH11 UNK C 1 16.004 -0.842 5.548 1.00 6.48 H  
ATOM 23 CH11 UNK C 1 15.411 -1.518 6.832 1.00 6.48 H  
ATOM 24 C12 UNK C 1 10.811 -1.708 2.248 1.00 2.84 C  
ATOM 25 AH12 UNK C 1 11.294 -2.546 2.322 1.00 3.40 H  
ATOM 26 BH12 UNK C 1 11.367 -1.087 1.753 1.00 3.40 H  
ATOM 27 C13 UNK C 1 9.538 -1.942 1.484 1.00 2.80 C  
ATOM 28 C14 UNK C 1 9.169 -1.136 0.437 1.00 4.28 C  
ATOM 29 H14 UNK C 1 9.713 -0.420 0.200 1.00 5.14 H  
ATOM 30 C15 UNK C 1 8.003 -1.366 -0.273 1.00 5.34 C  
ATOM 31 H15 UNK C 1 7.769 -0.808 -0.979 1.00 6.40 H  
ATOM 32 C16 UNK C 1 7.201 -2.412 0.068 1.00 4.69 C  
ATOM 33 C17 UNK C 1 7.563 -3.256 1.102 1.00 4.73 C  
ATOM 34 H17 UNK C 1 7.023 -3.980 1.324 1.00 5.68 H  
ATOM 35 C18 UNK C 1 8.729 -3.021 1.803 1.00 3.90 C  
ATOM 36 H18 UNK C 1 8.974 -3.591 2.496 1.00 4.68 H  
ATOM 37 C19 UNK C 1 5.957 -2.708 -0.699 1.00 7.28 C  
ATOM 38 C20 UNK C 1 8.270 -1.627 7.224 1.00 3.36 C  
ATOM 39 AH20 UNK C 1 8.390 -1.107 8.022 1.00 4.03 H  
ATOM 40 BH20 UNK C 1 8.436 -2.553 7.418 1.00 4.03 H  
ATOM 41 CH20 UNK C 1 7.370 -1.523 6.907 1.00 4.03 H  
ATOM 42 C21 UNK C 1 10.772 -2.955 6.653 1.00 2.43 C  
ATOM 43 C22 UNK C 1 10.202 -3.750 5.676 1.00 3.22 C  
ATOM 44 H22 UNK C 1 9.721 -3.364 4.980 1.00 3.86 H  
ATOM 45 C23 UNK C 1 10.354 -5.123 5.742 1.00 3.90 C  
ATOM 46 H23 UNK C 1 9.955 -5.639 5.080 1.00 4.68 H  
ATOM 47 C24 UNK C 1 11.590 -4.979 7.618 1.00 3.61 C  
ATOM 48 H24 UNK C 1 12.082 -5.394 8.289 1.00 4.33 H  
ATOM 49 C25 UNK C 1 11.487 -3.594 7.653 1.00 3.04 C  
ATOM 50 H25 UNK C 1 11.890 -3.106 8.334 1.00 3.65 H  
ATOM 51 C26 UNK C 1 7.548 0.210 5.068 1.00 2.57 C  
ATOM 52 C27 UNK C 1 6.663 1.268 5.156 1.00 3.91 C  
ATOM 53 H27 UNK C 1 6.857 2.002 5.693 1.00 4.69 H  
ATOM 54 C28 UNK C 1 5.479 1.218 4.431 1.00 5.34 C  
ATOM 55 H28 UNK C 1 4.904 1.947 4.490 1.00 6.41 H  
ATOM 56 C29 UNK C 1 5.977 -0.803 3.587 1.00 4.93 C  
ATOM 57 H29 UNK C 1 5.752 -1.529 3.051 1.00 5.91 H  
ATOM 58 C30 UNK C 1 7.182 -0.846 4.252 1.00 3.68 C  
ATOM 59 H30 UNK C 1 7.746 -1.579 4.152 1.00 4.41 H  
ATOM 60 N1 UNK C 1 10.571 -1.169 3.602 1.00 2.18 N  
ATOM 61 N2 UNK C 1 9.211 -1.166 6.192 1.00 2.28 N  
ATOM 62 N3 UNK C 1 11.035 -5.750 6.694 1.00 3.93 N1-  
ATOM 63 N4 UNK C 1 5.113 0.203 3.659 1.00 5.50 N1-

|         |    |    |     |    |    |        |        |        |      |       |     |
|---------|----|----|-----|----|----|--------|--------|--------|------|-------|-----|
| ATOM    | 64 | O1 | UNK | C  | 1  | 11.995 | 1.635  | 6.018  | 1.00 | 3.61  | O1- |
| ATOM    | 65 | O2 | UNK | C  | 1  | 13.132 | -0.915 | 7.711  | 1.00 | 4.12  | O1- |
| ATOM    | 66 | O3 | UNK | C  | 1  | 14.038 | -0.673 | 5.686  | 1.00 | 3.72  | O   |
| ATOM    | 67 | O4 | UNK | C  | 1  | 9.798  | 2.943  | 3.707  | 1.00 | 5.25  | O1- |
| ATOM    | 68 | O5 | UNK | C  | 1  | 9.364  | 2.945  | 5.890  | 1.00 | 3.55  | O   |
| ATOM    | 69 | F1 | UNK | C  | 1  | 5.528  | -1.656 | -1.425 | 1.00 | 14.53 | F   |
| ATOM    | 70 | F2 | UNK | C  | 1  | 6.117  | -3.523 | -1.645 | 1.00 | 14.38 | F   |
| ATOM    | 71 | F3 | UNK | C  | 1  | 4.970  | -3.024 | -0.012 | 1.00 | 17.08 | F   |
| TER     | 72 |    |     |    |    |        |        |        |      |       |     |
| CONNECT | 1  | 2  | 9   | 64 |    |        |        |        |      |       |     |
| CONNECT | 2  | 1  | 15  | 12 | 3  |        |        |        |      |       |     |
| CONNECT | 3  | 4  | 5   | 60 | 2  |        |        |        |      |       |     |
| CONNECT | 4  | 3  |     |    |    |        |        |        |      |       |     |
| CONNECT | 5  | 3  |     |    |    |        |        |        |      |       |     |
| CONNECT | 6  | 7  | 8   | 60 | 9  |        |        |        |      |       |     |
| CONNECT | 7  | 6  |     |    |    |        |        |        |      |       |     |
| CONNECT | 8  | 6  |     |    |    |        |        |        |      |       |     |
| CONNECT | 9  | 1  | 14  | 6  | 10 |        |        |        |      |       |     |
| CONNECT | 10 | 11 | 51  | 61 | 9  |        |        |        |      |       |     |
| CONNECT | 11 | 10 |     |    |    |        |        |        |      |       |     |
| CONNECT | 12 | 13 | 42  | 61 | 2  |        |        |        |      |       |     |
| CONNECT | 13 | 12 |     |    |    |        |        |        |      |       |     |
| CONNECT | 14 | 9  | 67  | 68 |    |        |        |        |      |       |     |
| CONNECT | 15 | 2  | 65  | 66 |    |        |        |        |      |       |     |
| CONNECT | 16 | 17 | 18  | 19 | 68 |        |        |        |      |       |     |
| CONNECT | 17 | 16 |     |    |    |        |        |        |      |       |     |
| CONNECT | 18 | 16 |     |    |    |        |        |        |      |       |     |
| CONNECT | 19 | 16 |     |    |    |        |        |        |      |       |     |
| CONNECT | 20 | 21 | 22  | 23 | 66 |        |        |        |      |       |     |
| CONNECT | 21 | 20 |     |    |    |        |        |        |      |       |     |
| CONNECT | 22 | 20 |     |    |    |        |        |        |      |       |     |
| CONNECT | 23 | 20 |     |    |    |        |        |        |      |       |     |
| CONNECT | 24 | 25 | 26  | 27 | 60 |        |        |        |      |       |     |
| CONNECT | 25 | 24 |     |    |    |        |        |        |      |       |     |
| CONNECT | 26 | 24 |     |    |    |        |        |        |      |       |     |
| CONNECT | 27 | 24 | 28  | 35 |    |        |        |        |      |       |     |
| CONNECT | 28 | 27 | 29  | 30 |    |        |        |        |      |       |     |
| CONNECT | 29 | 28 |     |    |    |        |        |        |      |       |     |
| CONNECT | 30 | 28 | 31  | 32 |    |        |        |        |      |       |     |
| CONNECT | 31 | 30 |     |    |    |        |        |        |      |       |     |
| CONNECT | 32 | 30 | 33  | 37 |    |        |        |        |      |       |     |
| CONNECT | 33 | 32 | 34  | 35 |    |        |        |        |      |       |     |
| CONNECT | 34 | 33 |     |    |    |        |        |        |      |       |     |
| CONNECT | 35 | 27 | 33  | 36 |    |        |        |        |      |       |     |
| CONNECT | 36 | 35 |     |    |    |        |        |        |      |       |     |
| CONNECT | 37 | 32 | 69  | 70 | 71 |        |        |        |      |       |     |
| CONNECT | 38 | 39 | 40  | 41 | 61 |        |        |        |      |       |     |
| CONNECT | 39 | 38 |     |    |    |        |        |        |      |       |     |
| CONNECT | 40 | 38 |     |    |    |        |        |        |      |       |     |
| CONNECT | 41 | 38 |     |    |    |        |        |        |      |       |     |
| CONNECT | 42 | 12 | 43  | 49 |    |        |        |        |      |       |     |
| CONNECT | 43 | 42 | 44  | 45 |    |        |        |        |      |       |     |
| CONNECT | 44 | 43 |     |    |    |        |        |        |      |       |     |
| CONNECT | 45 | 43 | 46  | 62 |    |        |        |        |      |       |     |
| CONNECT | 46 | 45 |     |    |    |        |        |        |      |       |     |
| CONNECT | 47 | 48 | 49  | 62 |    |        |        |        |      |       |     |
| CONNECT | 48 | 47 |     |    |    |        |        |        |      |       |     |
| CONNECT | 49 | 42 | 47  | 50 |    |        |        |        |      |       |     |
| CONNECT | 50 | 49 |     |    |    |        |        |        |      |       |     |
| CONNECT | 51 | 10 | 52  | 58 |    |        |        |        |      |       |     |
| CONNECT | 52 | 51 | 53  | 54 |    |        |        |        |      |       |     |
| CONNECT | 53 | 52 |     |    |    |        |        |        |      |       |     |
| CONNECT | 54 | 52 | 55  | 63 |    |        |        |        |      |       |     |
| CONNECT | 55 | 54 |     |    |    |        |        |        |      |       |     |
| CONNECT | 56 | 57 | 58  | 63 |    |        |        |        |      |       |     |
| CONNECT | 57 | 56 |     |    |    |        |        |        |      |       |     |
| CONNECT | 58 | 51 | 56  | 59 |    |        |        |        |      |       |     |
| CONNECT | 59 | 58 |     |    |    |        |        |        |      |       |     |
| CONNECT | 60 | 3  | 6   | 24 |    |        |        |        |      |       |     |
| CONNECT | 61 | 10 | 12  | 38 |    |        |        |        |      |       |     |
| CONNECT | 62 | 45 | 47  |    |    |        |        |        |      |       |     |
| CONNECT | 63 | 54 | 56  |    |    |        |        |        |      |       |     |

```
CONECT 64 1
CONECT 65 15
CONECT 66 15 20
CONECT 67 14
CONECT 68 14 16
CONECT 69 37
CONECT 70 37
CONECT 71 37
END
```

## Structure L7 (pdb file)

REMARK L7 PDB file  
CRYST1 13.127 16.744 25.548 90.00 90.00 90.00 PBCA  
ORIGX1 1.000000 0.000000 0.000000 0.000000  
ORIGX2 0.000000 1.000000 0.000000 0.000000  
ORIGX3 0.000000 0.000000 1.000000 0.000000  
SCALE1 0.076179 0.000000 0.000000 0.000000  
SCALE2 0.000000 0.059723 0.000000 0.000000  
SCALE3 0.000000 0.000000 0.039142 0.000000  
ATOM 1 O1 UNK C 1 1.603 5.949 25.497 1.00 0.00 O1-  
ATOM 2 O2 UNK C 1 -0.935 7.570 24.151 1.00 0.00 O1-  
ATOM 3 O3 UNK C 1 -0.752 5.426 23.532 1.00 0.00 O  
ATOM 4 O4 UNK C 1 2.953 6.191 28.075 1.00 0.00 O  
ATOM 5 O5 UNK C 1 2.812 3.969 28.169 1.00 0.00 O1-  
ATOM 6 N1 UNK C 1 -1.265 3.887 27.282 1.00 0.00 N  
ATOM 7 N2 UNK C 1 -1.186 6.635 28.246 1.00 0.00 N  
ATOM 8 N3 UNK C 1 0.378 4.993 32.725 1.00 0.00 N1-  
ATOM 9 N4 UNK C 1 -5.781 6.793 26.354 1.00 0.00 N1-  
ATOM 10 F1 UNK C 1 -4.196 0.797 34.459 1.00 0.00 F  
ATOM 11 F2 UNK C 1 -4.952 0.266 32.567 1.00 0.00 F  
ATOM 12 F3 UNK C 1 -5.001 2.234 33.180 1.00 0.00 F  
ATOM 13 C1 UNK C 1 0.676 5.733 26.252 1.00 0.00 C  
ATOM 14 C2 UNK C 1 0.826 5.226 27.666 1.00 0.00 C  
ATOM 15 C3 UNK C 1 0.204 6.321 28.606 1.00 0.00 C  
ATOM 16 H3 UNK C 1 0.737 7.139 28.520 1.00 0.00 H  
ATOM 17 C4 UNK C 1 -1.480 6.871 26.820 1.00 0.00 C  
ATOM 18 H4 UNK C 1 -1.169 7.772 26.591 1.00 0.00 H  
ATOM 19 C5 UNK C 1 -0.776 5.855 25.857 1.00 0.00 C  
ATOM 20 C6 UNK C 1 -1.337 4.420 25.924 1.00 0.00 C  
ATOM 21 H6A UNK C 1 -2.261 4.421 25.627 1.00 0.00 H  
ATOM 22 H6B UNK C 1 -0.831 3.847 25.327 1.00 0.00 H  
ATOM 23 C7 UNK C 1 0.127 3.849 27.728 1.00 0.00 C  
ATOM 24 H7A UNK C 1 0.617 3.222 27.174 1.00 0.00 H  
ATOM 25 H7B UNK C 1 0.156 3.523 28.641 1.00 0.00 H  
ATOM 26 C8 UNK C 1 -1.633 7.811 29.007 1.00 0.00 C  
ATOM 27 H8A UNK C 1 -1.206 8.598 28.661 1.00 0.00 H  
ATOM 28 H8B UNK C 1 -1.400 7.701 29.932 1.00 0.00 H  
ATOM 29 H8C UNK C 1 -2.585 7.901 28.926 1.00 0.00 H  
ATOM 30 C9 UNK C 1 -2.989 6.837 26.642 1.00 0.00 C  
ATOM 31 C10 UNK C 1 -3.627 7.670 25.743 1.00 0.00 C  
ATOM 32 H10 UNK C 1 -3.139 8.264 25.220 1.00 0.00 H  
ATOM 33 C11 UNK C 1 -5.006 7.606 25.636 1.00 0.00 C  
ATOM 34 H11 UNK C 1 -5.420 8.168 25.021 1.00 0.00 H  
ATOM 35 C12 UNK C 1 -5.144 5.999 27.216 1.00 0.00 C  
ATOM 36 H12 UNK C 1 -5.652 5.418 27.735 1.00 0.00 H  
ATOM 37 C13 UNK C 1 -3.782 5.989 27.380 1.00 0.00 C  
ATOM 38 H13 UNK C 1 -3.393 5.407 27.993 1.00 0.00 H  
ATOM 39 C14 UNK C 1 0.261 5.867 30.045 1.00 0.00 C  
ATOM 40 C19 UNK C 1 2.294 5.035 28.005 1.00 0.00 C  
ATOM 41 C15 UNK C 1 -0.738 5.080 30.597 1.00 0.00 C  
ATOM 42 H15 UNK C 1 -1.472 4.826 30.085 1.00 0.00 H  
ATOM 43 C18 UNK C 1 1.309 6.215 30.882 1.00 0.00 C  
ATOM 44 H18 UNK C 1 1.998 6.756 30.568 1.00 0.00 H  
ATOM 45 C21 UNK C 1 -0.845 6.394 24.441 1.00 0.00 C  
ATOM 46 C28 UNK C 1 -1.446 1.286 29.472 1.00 0.00 C  
ATOM 47 H28 UNK C 1 -0.690 0.895 29.098 1.00 0.00 H  
ATOM 48 C30 UNK C 1 -2.885 1.583 31.332 1.00 0.00 C  
ATOM 49 C27 UNK C 1 -2.229 2.136 28.707 1.00 0.00 C  
ATOM 50 C31 UNK C 1 -3.708 2.416 30.603 1.00 0.00 C  
ATOM 51 H31 UNK C 1 -4.469 2.792 30.984 1.00 0.00 H  
ATOM 52 C32 UNK C 1 -3.364 2.673 29.286 1.00 0.00 C  
ATOM 53 H32 UNK C 1 -3.913 3.224 28.776 1.00 0.00 H  
ATOM 54 C16 UNK C 1 -0.633 4.677 31.914 1.00 0.00 C  
ATOM 55 H16 UNK C 1 -1.315 4.147 32.260 1.00 0.00 H  
ATOM 56 C25 UNK C 1 -1.856 2.537 27.312 1.00 0.00 C  
ATOM 57 AH25 UNK C 1 -1.220 1.899 26.953 1.00 0.00 H  
ATOM 58 BH25 UNK C 1 -2.647 2.520 26.750 1.00 0.00 H  
ATOM 59 C17 UNK C 1 1.326 5.753 32.190 1.00 0.00 C  
ATOM 60 H17 UNK C 1 2.047 5.991 32.726 1.00 0.00 H  
ATOM 61 C29 UNK C 1 -1.779 1.013 30.787 1.00 0.00 C  
ATOM 62 H29 UNK C 1 -1.249 0.442 31.295 1.00 0.00 H  
ATOM 63 C22 UNK C 1 -0.865 5.809 22.145 1.00 0.00 C

|      |    |      |     |   |   |        |       |        |      |      |  |   |
|------|----|------|-----|---|---|--------|-------|--------|------|------|--|---|
| ATOM | 64 | AH22 | UNK | C | 1 | -1.743 | 6.160 | 21.980 | 1.00 | 0.00 |  | H |
| ATOM | 65 | BH22 | UNK | C | 1 | -0.718 | 5.041 | 21.588 | 1.00 | 0.00 |  | H |
| ATOM | 66 | CH22 | UNK | C | 1 | -0.208 | 6.480 | 21.944 | 1.00 | 0.00 |  | H |
| ATOM | 67 | O6   | UNK | C | 1 | -3.078 | 1.333 | 32.709 | 1.00 | 0.00 |  | O |
| ATOM | 68 | C20  | UNK | C | 1 | 4.371  | 6.099 | 28.338 | 1.00 | 0.00 |  | C |
| ATOM | 69 | AH20 | UNK | C | 1 | 4.515  | 5.594 | 29.141 | 1.00 | 0.00 |  | H |
| ATOM | 70 | BH20 | UNK | C | 1 | 4.734  | 6.981 | 28.444 | 1.00 | 0.00 |  | H |
| ATOM | 71 | CH20 | UNK | C | 1 | 4.805  | 5.661 | 27.602 | 1.00 | 0.00 |  | H |
| ATOM | 72 | C24  | UNK | C | 1 | -4.273 | 1.114 | 33.187 | 1.00 | 0.00 |  | C |

TER 73

|         |    |    |    |    |    |
|---------|----|----|----|----|----|
| CONNECT | 1  | 13 |    |    |    |
| CONNECT | 2  | 45 |    |    |    |
| CONNECT | 3  | 45 | 63 |    |    |
| CONNECT | 4  | 40 | 68 |    |    |
| CONNECT | 5  | 40 |    |    |    |
| CONNECT | 6  | 20 | 23 | 56 |    |
| CONNECT | 7  | 15 | 17 | 26 |    |
| CONNECT | 8  | 54 | 59 |    |    |
| CONNECT | 9  | 33 | 35 |    |    |
| CONNECT | 10 | 72 |    |    |    |
| CONNECT | 11 | 72 |    |    |    |
| CONNECT | 12 | 72 |    |    |    |
| CONNECT | 13 | 1  | 14 | 19 |    |
| CONNECT | 14 | 13 | 40 | 23 | 15 |
| CONNECT | 15 | 7  | 16 | 39 | 14 |
| CONNECT | 16 | 15 |    |    |    |
| CONNECT | 17 | 7  | 18 | 30 | 19 |
| CONNECT | 18 | 17 |    |    |    |
| CONNECT | 19 | 13 | 45 | 17 | 20 |
| CONNECT | 20 | 6  | 21 | 22 | 19 |
| CONNECT | 21 | 20 |    |    |    |
| CONNECT | 22 | 20 |    |    |    |
| CONNECT | 23 | 6  | 24 | 25 | 14 |
| CONNECT | 24 | 23 |    |    |    |
| CONNECT | 25 | 23 |    |    |    |
| CONNECT | 26 | 7  | 27 | 28 | 29 |
| CONNECT | 27 | 26 |    |    |    |
| CONNECT | 28 | 26 |    |    |    |
| CONNECT | 29 | 26 |    |    |    |
| CONNECT | 30 | 17 | 31 | 37 |    |
| CONNECT | 31 | 30 | 32 | 33 |    |
| CONNECT | 32 | 31 |    |    |    |
| CONNECT | 33 | 9  | 31 | 34 |    |
| CONNECT | 34 | 33 |    |    |    |
| CONNECT | 35 | 9  | 36 | 37 |    |
| CONNECT | 36 | 35 |    |    |    |
| CONNECT | 37 | 30 | 35 | 38 |    |
| CONNECT | 38 | 37 |    |    |    |
| CONNECT | 39 | 15 | 41 | 43 |    |
| CONNECT | 40 | 4  | 5  | 14 |    |
| CONNECT | 41 | 39 | 42 | 54 |    |
| CONNECT | 42 | 41 |    |    |    |
| CONNECT | 43 | 39 | 44 | 59 |    |
| CONNECT | 44 | 43 |    |    |    |
| CONNECT | 45 | 2  | 3  | 19 |    |
| CONNECT | 46 | 47 | 49 | 61 |    |
| CONNECT | 47 | 46 |    |    |    |
| CONNECT | 48 | 50 | 61 | 67 |    |
| CONNECT | 49 | 46 | 52 | 56 |    |
| CONNECT | 50 | 48 | 51 | 52 |    |
| CONNECT | 51 | 50 |    |    |    |
| CONNECT | 52 | 49 | 50 | 53 |    |
| CONNECT | 53 | 52 |    |    |    |
| CONNECT | 54 | 8  | 41 | 55 |    |
| CONNECT | 55 | 54 |    |    |    |
| CONNECT | 56 | 6  | 49 | 57 | 58 |
| CONNECT | 57 | 56 |    |    |    |
| CONNECT | 58 | 56 |    |    |    |
| CONNECT | 59 | 8  | 43 | 60 |    |
| CONNECT | 60 | 59 |    |    |    |
| CONNECT | 61 | 46 | 48 | 62 |    |
| CONNECT | 62 | 61 |    |    |    |

```
CONNECT 63 3 64 65 66
CONNECT 64 63
CONNECT 65 63
CONNECT 66 63
CONNECT 67 48 72
CONNECT 68 4 69 70 71
CONNECT 69 68
CONNECT 70 68
CONNECT 71 68
CONNECT 72 10 11 12 67
END
```
